# Supplementary material
Source: MDPI journal article supplement (https://www.mdpi.com/2076-3263/9/2/95)
Supplement: s1 [file s1]

## Sheet: Sample List
Sample ID	County	CDL Crop Type	FMMP Land Type	NO3- [mg/L]	DO [mg/L]	N2 [cm3 STP/g]	Ar [cm3 STP/g]	N2 / Ar ratio average	Excess N2 equivalent NO3 [mg/L]	δ18O-H2O (SMOW) [per mil]	δ2H-H2O (SMOW) [per mil]	δ15N-NO3- (Air) [per mil]	δ18O-NO3- (SMOW) [per mil]	Predicted δ18O-NO3- [per mil]	Actual-Predicted δ18O-NO3- [per mil]
2	Alameda	Developed/Med Intensity	Other	44.1		0.0137175	0.000325094	42.1955	-1.99619	-7.89999	-59.2964	3.42661	-0.939895	2.56668	-3.50657
3	Alameda	Developed/Med Intensity	Farmland of State Importance	18		0.0171266	0.000480466	35.6457	-20.4451	-8.8294	-63.8196	4.3956	-0.180316	1.94706	-2.12738
8	Alameda	Developed/Med Intensity	Other	42.9		0.0134186	0.000330254	40.6312	-4.89981	-7.98974	-63.8362	4.62016	0.403083	2.50684	-2.10376
11	Alameda	Grass/Pasture	Other	36.5		0.0158001	0.000388812	40.6369	-5.75638	-7.5292	-55.4945	5.81758	0.814283	2.81387	-1.99959
13	Alameda	Developed/Open Space	Farmland of State Importance	50.6		0.0132888	0.000326966	40.6427	-4.83017	-7.61129	-51.8231	6.85483	1.04723	2.75914	-1.71191
15	Alameda	Grass/Pasture	Farmland of State Importance	32		0.016204	0.000398941	40.6175	-5.94947	-7.61176	-55.8773	5.95355	1.24188	2.75883	-1.51694
16	Alameda	Developed/Low Intensity	Other	37.9		0.0163087	0.000390598	41.7532	-3.35879	-7.81252	-56	6.61974	1.34875	2.62499	-1.27624
20	Alameda	Developed/Open Space	Farmland of State Importance	24		0.0145949	0.000355606	41.0424	-4.46302	-8.92073	-64.0085	2.66839	1.84981	1.88618	-0.0363742
21	Alameda	Developed/Open Space	Farmland of State Importance	29		0.0120236	0.000281685	42.6847	-0.963538	-7.93525	-59.4887	6.20338	1.94096	2.54317	-0.602209
22	Alameda	Developed/Low Intensity	Other	29.9		0.0158429	0.000375178	42.2278	-2.23638	-7.96607	-59	5.35154	2.02306	2.52262	-0.499561
25	Alameda	Developed/Open Space	Farmland of State Importance	56.7		0.0146476	0.00035151	41.6706	-3.18418	-7.60044	-54.0061	6.1318	2.19206	2.76638	-0.574316
36	Alameda	Developed/Open Space	Farmland of State Importance	72		0.0150497	0.000363549	41.3967	-3.84672	-7.54666	-55.0048	7.19433	2.70945	2.80223	-0.0927821
53	Alameda	Developed/Low Intensity	Other	42.8		0.0150565	0.000359377	41.8962	-2.80462	-8.16719	-58.2041	8.89795	3.25137	2.38854	0.862826
55	Alameda	Developed/Low Intensity	Other	15.8		0.0155228	0.000367691	42.2171	-2.21367	-7.8078	-56	9.73613	3.30639	2.62814	0.678255
62	Alameda	Developed/Low Intensity	Other	15.9		0.0163098	0.000415994	39.2069	-9.46598	-8.11035	-58.3529	8.64152	3.51908	2.42643	1.09265
63	Alameda	Grass/Pasture	Grazing Land	0		0.0175769	0.000414305	42.425	-2.01543	-6.29	0	11.2864	3.54821	3.64	-0.0917871
74	Alameda	Developed/Med Intensity	Urban and Built-Up Land	1.61	2.7					-6.54		8.54	3.99	3.47333	0.516667
75	Alameda	Developed/Med Intensity	Other	48.8		0.0101105	0.000285313	35.4367	-12.4724	-8.32788	-57.9782	8.14792	4.01194	2.28141	1.73053
76	Alameda	Developed/Low Intensity	Other	56.5		0.0140889	0.000332563	42.3646	-1.72943	-7.84315	-58.3318	7.95834	4.02842	2.60457	1.42386
85	Alameda	Developed/Med Intensity	Urban and Built-Up Land	2.73	1.9					-6.53		8.5	4.29	3.48	0.81
86	Alameda	Developed/Low Intensity	Other	40.7		0.015883	0.000396915	40.0162	-7.24596	-7.69779	-54.3292	8.57069	4.31642	2.70147	1.61495
87	Alameda	Developed/Low Intensity	Other	13.6		0.016859	0.000431697	39.0528	-10.193	-7.97593	-57.0693	9.39361	4.32855	2.51605	1.8125
92	Alameda	Developed/Low Intensity	Other	85.75		0.0118092	0.000293444	40.2436	-4.98613	-7.62328	-54.8386	10.105	4.60981	2.75114	1.85867
99	Alameda	Developed/Low Intensity	Other	47.11		0.0127242	0.00031649	40.204	-5.44735	-8.22055	-59.2799	11.0224	4.9771	2.35296	2.62414
100	Alameda	Developed/Low Intensity	Other	47.63		0.0143118	0.000348791	41.0325	-4.39686	-8.12007	-58.817	10.652	4.98959	2.41995	2.56964
101	Alameda	Grass/Pasture	Farmland of State Importance	68.3		0.0115117	0.000289743	39.7307	-5.74943	-7.59071	-54.0717	9.28446	5.03774	2.77286	2.26488
104	Alameda	Developed/Med Intensity	Urban and Built-Up Land	2.02	0.2					-6.85		10.66	5.14	3.26667	1.87333
106	Alameda	Grass/Pasture	Other	20.1		0.0164169	0.000406678	40.3682	-6.62835	-7.65078	-56	12.7813	5.20882	2.73281	2.47601
109	Alameda	Developed/Low Intensity	Other	49		0.0174094	0.000382995	45.4559	4.59042	-7.69229	-54.8031	8.43208	5.44515	2.70514	2.74001
112	Alameda	Grass/Pasture	Grazing Land	0		0.0178778	0.000448922	39.824	-8.67515	-6.33	0	14.1161	5.61813	3.61333	2.0048
114	Alameda	Developed/Low Intensity	Other	23.9		0.0148941	0.000339264	43.9012	1.1339	-7.85543	-54.4591	13.0439	5.77678	2.59638	3.1804
115	Alameda	Mixed Forest	Other	0.059	2.5					-6.48		11.75	5.81	3.51333	2.29667
117	Alameda	Developed/Med Intensity	Urban and Built-Up Land	11	0.3					-6.31		8.15	6.24	3.62667	2.61333
118	Butte	Background	Urban and Built-Up Land	7.3352		0.0157338	0.00037845	41.5743	-3.63079	-10.1492	0	6.3546	-1.98259	1.0672	-3.0498
119	Butte	Background	Urban and Built-Up Land	61.3		0.0153466	0.000379104	40.4813	-5.9406	-8.86297	0	3.28296	-1.37238	1.92469	-3.29707
120	Butte	Background	Urban and Built-Up Land	6.6957		0.0150061	0.0003591	41.7881	-3.01825	-9.12569	0	3.87089	-1.19338	1.74954	-2.94292
121	Butte	Background	Urban and Built-Up Land	23.9		0.0166635	0.000416339	40.0239	-7.58272	-8.6219	0	8.14138	-0.945581	2.0854	-3.03098
122	Butte	Background	Urban and Built-Up Land	30.61		0.0149281	0.000376296	39.6711	-7.59157	-8.47691	0	9.93033	-0.25355	2.18206	-2.43561
123	Butte	Background	Urban and Built-Up Land	8.50955		0.0177289	0.000414105	42.8126	-1.12203	-9.89215	0	5.43012	-0.181513	1.23857	-1.42008
124	Butte	Background	Urban and Built-Up Land	24.53		0.0206316	0.000450688	45.778	6.20877	-9.56327	0	9.28502	-0.152756	1.45782	-1.61057
125	Butte	Background	Urban and Built-Up Land	35.34		0.0190826	0.00044184	43.189	-0.272722	-8.87232	0	6.50085	-0.139557	1.91846	-2.05801
126	Butte	Background	Urban and Built-Up Land	0.544	6.9					-8.72		2.71	0.01	2.02	-2.01
127	Butte	Background	Urban and Built-Up Land	18.2127		0.0160562	0.000384095	41.8028	-3.19709	-9.92658	0	9.65007	0.0452175	1.21561	-1.17039
128	Butte	Background	Urban and Built-Up Land	3.596		0.0173361	0.00042457	40.8321	-5.82495	-9.86347	0	7.18104	0.133647	1.25769	-1.12404
129	Butte	Background	Urban and Built-Up Land	2.36	4					-10.06		8.3	0.38	1.12667	-0.746667
130	Butte	Background	Urban and Built-Up Land	32.54		0.0235771	0.000482105	48.9045	15.0211	-8.99339	0	14.5134	0.38962	1.83774	-1.44812
131	Butte	Background	Urban and Built-Up Land	30.9		0.0193307	0.000424553	45.5319	5.26781	-8.4596	0	4.61249	0.514861	2.1936	-1.67874
132	Butte	Background	Urban and Built-Up Land	16.6389		0.0167629	0.000396088	42.3212	-2.15525	-8.42533	0	10.0318	0.769435	2.21645	-1.44701
133	Butte	Background	Urban and Built-Up Land	55.0895		0.022324	0.000456684	48.8827	14.1738	-8.75253	0	8.24291	0.836286	1.99831	-1.16202
134	Butte	Background	Urban and Built-Up Land	0.776	9.9					-8.8		4.38	1	1.96667	-0.966667
135	Butte	Background	Urban and Built-Up Land	0.738	8.7					-9.58		4.59	1.39	1.44667	-0.0566667
136	Butte	Background	Urban and Built-Up Land	68.6		0.0155279	0.000394615	39.3494	-8.66683	-9.05092	0	3.77082	1.54936	1.79939	-0.250033
137	Butte	Background	Urban and Built-Up Land	10.4514		0.0160486	0.000367328	43.6902	0.796885	-9.92511	0	6.02258	1.57065	1.21659	0.354063
138	Butte	Background	Urban and Built-Up Land	25.64		0.0193494	0.000427598	45.2515	4.63896	-9.21641	0	8.41299	1.7914	1.68906	0.102343
139	Butte	Background	Urban and Built-Up Land	4.7906		0.0144596	0.000347502	41.6102	-3.26446	-8.72781	0	5.82398	1.99706	2.01479	-0.0177282
140	Butte	Background	Urban and Built-Up Land	19.2074		0.0156012	0.000376787	41.4058	-3.96774	-10.185	0	7.76053	2.02846	1.04336	0.985102
141	Butte	Fallow/Idle Cropland	Other	0.158	0.5					-9.14		4.07	2.17	1.74	0.43
142	Butte	Developed/Med Intensity	Urban and Built-Up Land	0.786	6.9					-8.25		3.92	2.58	2.33333	0.246667
143	Butte	Developed/Low Intensity	Urban and Built-Up Land	2.46	3.2					-8.8		8.43	2.76	1.96667	0.793333
144	Butte	Developed/Low Intensity	Urban and Built-Up Land	1.62	2.1					-9.48		6.38	2.86	1.51333	1.34667
145	Butte	Background	Urban and Built-Up Land	25.18		0.0157398	0.000394831	39.8646	-7.54064	-8.7382	0	7.76355	3.57321	2.00787	1.56534
146	Butte	Developed/Low Intensity	Urban and Built-Up Land	10.4	8.9					-7.51		3.52	3.99	2.82667	1.16333
147	Butte	Background	Prime Farmland	92.1		0.0218445	0.000485606	44.9839	4.54587	-9.10702	0	4.75672	4.31463	1.76199	2.55265
148	Butte	Developed/Open Space	Other	0.889	2.5					-7.37		9.88	5.64	2.92	2.72
149	Colusa	Rice	Unique Farmland	0.765	1.8					-9.21		5	-0.2	1.69333	-1.89333
150	Colusa	Winter Wheat	Prime Farmland	6.04	7.9					-8.38		1.58	0.29	2.24667	-1.95667
151	Colusa	Grass/Pasture	Urban and Built-Up Land	1.24	5.1					-8.53		7.46	0.34	2.14667	-1.80667
152	Fresno	Walnuts	Prime Farmland	3.42	6.3					-13.55		8.74	-2.62	-1.2	-1.42
153	Fresno	Almonds	Farmland of Local Importance	13.5	6.7					-12.02		2.62	-2.27	-0.18	-2.09
154	Fresno	Developed/Med Intensity	Farmland of Local Importance	0.887	5.8					-13.24		6.4	-2.25	-0.993333	-1.25667
155	Fresno	Grass/Pasture	Urban and Built-Up Land	1.27	6.4					-11.97		5.08	-2.06	-0.146667	-1.91333
156	Fresno	Winter Wheat	Rural/Residential	0.471	7.1					-13.35		2.14	-1.81	-1.06667	-0.743333
157	Fresno	Grapes	Prime Farmland	1.91	4.4					-13.08		3.6	-1.72	-0.886667	-0.833333
158	Fresno	Fallow/Idle Cropland	Rural/Residential	2.19	6.3					-11.11		5.02	-1.55	0.426667	-1.97667
159	Fresno	Developed/Low Intensity	Urban and Built-Up Land	2.54	6.3					-12.06		6.63	-1.46	-0.206667	-1.25333
160	Fresno	Alfalfa	Prime Farmland	17.3	5.9					-12.56		2.37	-1.42	-0.54	-0.88
161	Fresno	Developed/High Intensity	Urban and Built-Up Land	1.34	7					-12.7		5.57	-1.26	-0.633333	-0.626667
162	Fresno	Developed/Med Intensity	Urban and Built-Up Land	1.69	5.3					-13.29		6.97	-1.22	-1.02667	-0.193333
163	Fresno	Developed/Low Intensity	Unique Farmland	9.35	4.3					-9.83		6.09	-1.12	1.28	-2.4
164	Fresno	Grass/Pasture	Unique Farmland	3.59	6.5					-13.1		4.9	-1.09	-0.9	-0.19
165	Fresno	Developed/Med Intensity	Urban and Built-Up Land	2.81	6					-11.7		5.31	-1.08	0.0333333	-1.11333
166	Fresno	Garlic	Unique Farmland	13.2	6.7					-10.18		6.4	-1.08	1.04667	-2.12667
167	Fresno	Developed/Low Intensity	Urban and Built-Up Land	6.41	6.5					-9.43		5.18	-1.07	1.54667	-2.61667
168	Fresno	Alfalfa	Urban and Built-Up Land	60.2	4.5					-11.91		9.6	-0.99	-0.106667	-0.883333
169	Fresno	Grass/Pasture	Farmland of Local Importance	0.743	7.6					-13.53		4.05	-0.92	-1.18667	0.266667
170	Fresno	Developed/Med Intensity	Urban and Built-Up Land	4.64	6.4					-9.39		4.24	-0.66	1.57333	-2.23333
171	Fresno	Developed/Med Intensity	Urban and Built-Up Land	2.09	8.7					-9.95		3.73	-0.56	1.2	-1.76
172	Fresno	Cherries	Farmland of Local Importance	2.8	9.1					-9.78		4.69	-0.02	1.31333	-1.33333
173	Fresno	Alfalfa	Prime Farmland	16.8	5.2					-12.66		7.4	-0.01	-0.606667	0.596667
174	Fresno	Developed/Med Intensity	Vacant Disturbed	7.59	3.8					-10.45		5.88	-0.01	0.866667	-0.876667
175	Fresno	Developed/Med Intensity	Prime Farmland	4.28	5.2					-8.58		3.61	0	2.11333	-2.11333
176	Fresno	Alfalfa	Farmland of State Importance	19.7	8.3					-7.19		3.4	0.11	3.04	-2.93
177	Fresno	Grass/Pasture	Unique Farmland	2.39	5.7					-7.8		3.58	0.25	2.63333	-2.38333
178	Fresno	Grass/Pasture	Farmland of Local Importance	4.93	6.1					-10.07		5.1	0.26	1.12	-0.86
179	Fresno	Grass/Pasture	Natural Vegetation Non-agriculutre	3.21	6.9					-8.1		3.58	0.36	2.43333	-2.07333
180	Fresno	Developed/Low Intensity	Urban and Built-Up Land	6.78	6.3					-9.18		6.57	0.42	1.71333	-1.29333
181	Fresno	Developed/Med Intensity	Urban and Built-Up Land	6.95	6.5					-8.56		4.71	0.42	2.12667	-1.70667
182	Fresno	Grass/Pasture	Urban and Built-Up Land	2.75	5.1					-10.22		2.98	0.59	1.02	-0.43
183	Fresno	Cherries	Farmland of Local Importance	2.44	5.3					-9.33		4.24	0.75	1.61333	-0.863333
184	Fresno	Grass/Pasture	Unique Farmland	4.41	5.4					-9.24		3.71	0.75	1.67333	-0.923333
185	Fresno	Developed/Low Intensity	Urban and Built-Up Land	1.76	6.8					-10.55		3.64	0.79	0.8	-0.01
186	Fresno	Grass/Pasture	Vacant Disturbed	2.77	3.5					-7.72		4	0.81	2.68667	-1.87667
187	Fresno	Cherries	Farmland of Local Importance	6.13	9.1					-10.6		4.72	0.85	0.766667	0.0833333
188	Fresno	Developed/Low Intensity	Urban and Built-Up Land	10.3	4.9					-9.36		6.84	0.87	1.59333	-0.723333
189	Fresno	Grass/Pasture	Vacant Disturbed	2.79	3.5					-7.68		4	0.92	2.71333	-1.79333
190	Fresno	Alfalfa	Unique Farmland	2.73	5.2					-7.81		3.42	0.96	2.62667	-1.66667
191	Fresno	Grass/Pasture	Vacant Disturbed	2.82	3.5					-7.62		3.97	1	2.75333	-1.75333
192	Fresno	Grass/Pasture	Farmland of Local Importance	2.45	3.2					-8.1		3.42	1.04	2.43333	-1.39333
193	Fresno	Developed/Low Intensity	Urban and Built-Up Land	5.33	7					-10.32		3.43	1.06	0.953333	0.106667
194	Fresno	Alfalfa	Rural/Residential	10.3	6.4					-8.53		5.8	1.08	2.14667	-1.06667
195	Fresno	Grapes	Farmland of State Importance	13.4	4.3					-10.46		8.95	1.23	0.86	0.37
196	Fresno	Developed/Low Intensity	Urban and Built-Up Land	3.54	3.5					-7.56		3.94	1.29	2.79333	-1.50333
197	Fresno	Grapes	Unique Farmland	7.28	5.8					-10.57		4.64	1.3	0.786667	0.513333
198	Fresno	Developed/Med Intensity	Unique Farmland	6.32	< 0.2					-9.98		4.94	1.36	1.18	0.18
199	Fresno	Grass/Pasture	Unique Farmland	2.38	5.7					-7.89		3.49	1.37	2.57333	-1.20333
200	Fresno	Cherries	Farmland of Local Importance	4.01	5.3					-10.17		3.99	1.39	1.05333	0.336667
201	Fresno	Developed/Low Intensity	Urban and Built-Up Land	4.8	4.7					-7.71		3.96	1.4	2.69333	-1.29333
202	Fresno	Developed/Open Space	Farmland of State Importance	1.77	0.5					-8.98		7	1.41	1.84667	-0.436667
203	Fresno	Alfalfa	Unique Farmland	29.7	7.6					-10.76		5.14	1.44	0.66	0.78
204	Fresno	Grass/Pasture	Vacant Disturbed	2.89	3.5					-7.65		3.84	1.52	2.73333	-1.21333
205	Fresno	Alfalfa	Unique Farmland	6.07	8.2					-10.2		5.62	1.71	1.03333	0.676667
206	Fresno	Grass/Pasture	Farmland of Local Importance	14.5	5.4					-11.98		4.3	1.72	-0.153333	1.87333
207	Fresno	Developed/Med Intensity	Urban and Built-Up Land	8.24	7.9					-10.27		5.51	1.77	0.986667	0.783333
208	Fresno	Almonds	Unique Farmland	7.44	4.3					-8.66		6.69	1.93	2.06	-0.13
209	Fresno	Grass/Pasture	Unique Farmland	19.5	5.3					-11.42		5.81	1.95	0.22	1.73
210	Fresno	Grapes	Prime Farmland	23.7	E 5.6					-12.18		6.36	2.05	-0.286667	2.33667
211	Fresno	Alfalfa	Rural/Residential	11.6	6.4					-9.06		6.06	2.09	1.79333	0.296667
212	Fresno	Alfalfa	Rural/Residential	5.51	3.4					-8.06		5.79	2.21	2.46	-0.25
213	Fresno	Grass/Pasture	Urban and Built-Up Land	24.3	5.5					-10.31		3.39	2.26	0.96	1.3
214	Fresno	Cherries	Farmland of Local Importance	12.8	8.3					-11.71		5.37	2.31	0.0266667	2.28333
215	Fresno	Almonds	Prime Farmland	3.15	2.1					-11.37		7.74	2.34	0.253333	2.08667
216	Fresno	Grass/Pasture	Unique Farmland	7.17	4.5					-10.59		6.14	2.35	0.773333	1.57667
217	Fresno	Grass/Pasture	Prime Farmland	11.9	5.9					-7.62		5.84	2.38	2.75333	-0.373333
218	Fresno	Grass/Pasture	Prime Farmland	8.54	6.3					-11.52		4.14	2.39	0.153333	2.23667
219	Fresno	Grass/Pasture	Unique Farmland	8.77	4.5					-10.77		5.39	2.39	0.653333	1.73667
220	Fresno	Grass/Pasture	Farmland of Local Importance	23	5.2					-11.56		4.21	2.6	0.126667	2.47333
221	Fresno	Grass/Pasture	Urban and Built-Up Land	17.4	6.3					-11.46		4.84	2.67	0.193333	2.47667
222	Fresno	Grass/Pasture	Rural/Residential	13.8	4.2					-9.12		7.19	2.81	1.75333	1.05667
223	Fresno	Grass/Pasture	Farmland of Local Importance	20.7	5.1					-11.6		4.57	2.93	0.1	2.83
224	Fresno	Alfalfa	Unique Farmland	18.1	4					-10.97		5.81	2.94	0.52	2.42
225	Fresno	Alfalfa	Rural/Residential	34.3	5.9					-7.86		6.19	3.03	2.59333	0.436667
226	Fresno	Fallow/Idle Cropland	Semi-Agriculture and Rural Commercial Lands	2.52	2					-9.41		6.95	3.06	1.56	1.5
227	Fresno	Grass/Pasture	Vacant Disturbed	16.3	6.2					-8.43		4.51	3.17	2.21333	0.956667
228	Fresno	Grass/Pasture	Unique Farmland	25.8	5.3					-10.98		6.24	3.22	0.513333	2.70667
229	Fresno	Cherries	Farmland of Local Importance	15.2	8.3					-11.5		5.12	3.35	0.166667	3.18333
230	Fresno	Grass/Pasture	Grazing Land	7.92	3.7					-7.99		5.68	3.38	2.50667	0.873333
231	Fresno	Alfalfa	Rural/Residential	14.9	5.9					-10.37		5.83	3.48	0.92	2.56
232	Fresno	Grass/Pasture	Vacant Disturbed	13.2	6.2					-8.38		4.21	3.64	2.24667	1.39333
233	Fresno	Grass/Pasture	Vacant Disturbed	15.5	6.2					-8.32		4.4	3.73	2.28667	1.44333
234	Fresno	Grass/Pasture	Vacant Disturbed	12.1	6.2					-8.12		5.4	3.84	2.42	1.42
235	Fresno	Grass/Pasture	Rural/Residential	9.26	5.2					-6.47		3.82	4.04	3.52	0.52
236	Glenn	Developed/Low Intensity	Urban and Built-Up Land	1.84	3.2					-8.87		4.85	0.06	1.92	-1.86
237	Glenn	Background	Farmland of Local Importance	2.82	5.8					-8.96		4.49	0.07	1.86	-1.79
238	Glenn	Background	Prime Farmland	2.54	4.8					-8.75		3.67	0.4	2	-1.6
239	Glenn	Walnuts	Prime Farmland	6.01	1.5					-8.01		5.65	0.98	2.49333	-1.51333
240	Glenn	Background	Urban and Built-Up Land	3.43	4.1					-8.61		5.82	1.02	2.09333	-1.07333
241	Glenn	Almonds	Prime Farmland	9.1	E 20.4					-9.04		5.07	1.96	1.80667	0.153333
242	Glenn	Background	Other	0.968	13.3					-9.37		7.86	2.63	1.58667	1.04333
243	Glenn	Fallow/Idle Cropland	Prime Farmland	1.89	1.4					-9.7		7.43	3.42	1.36667	2.05333
244	Glenn	Background	Water	1.03	2.7					-9.46		11.54	3.57	1.52667	2.04333
245	Kern	Almonds	Prime Farmland	2.04	3					-13.76		3.13	-3.27	-1.34	-1.93
246	Kern	Developed/Low Intensity	Urban and Built-Up Land	4.48	5.4					-13.38		2.99	-2.46	-1.08667	-1.37333
247	Kern	Developed/Med Intensity	Urban and Built-Up Land	0.46	4					-11.88		7.16	-1.5	-0.0866667	-1.41333
248	Kern	Fallow/Idle Cropland	Urban and Built-Up Land	1.12	3					-13.03		6.52	-1.28	-0.853333	-0.426667
249	Kern	Grass/Pasture	Grazing Land	1.04	5.8					-11.64		6.84	-1.14	0.0733333	-1.21333
250	Kern	Developed/Med Intensity	Urban and Built-Up Land	8.5	9					-11.06		3.76	-0.29	0.46	-0.75
251	Kern	Grass/Pasture	Grazing Land	1.92	7.8					-12.86		4.58	-0.06	-0.74	0.68
252	Kern	Almonds	Urban and Built-Up Land	13.4	4					-8.5		4.93	2.59	2.16667	0.423333
253	Kern	Developed/Open Space	Prime Farmland	0.54	< 0.2					-8.67		6.24	4.75	2.05333	2.69667
254	Kings	Confined Animal Agriculture	Prime Farmland	146.663		0.016083	0.000387732	41.4797	-3.92363	-12.3542	-93	13.549	-1.79988	-0.402825	-1.39705
255	Kings	Confined Animal Agriculture	Prime Farmland	190		0.0205044	0.000434444	47.1969	9.41177	-12.6692	0	9.66191	-0.259508	-0.612824	0.353316
256	Kings	Confined Animal Agriculture	Prime Farmland	164.345		0.0155195	0.000337503	45.9833	5.03463	-12.1	0	13.0954	-0.212829	-0.233333	0.0205044
257	Kings	Confined Animal Agriculture	Prime Farmland	169.119		0.0266225	0.000409578	64.9998	49.4101	-12.2	0	13.1627	0.220684	-0.3	0.520684
258	Kings	Confined Animal Agriculture	Farmland of State Importance	163.9		0.0251603	0.000494767	50.8527	20.7744	-12.1	0	12.1413	0.470185	-0.233333	0.703519
259	Kings	Confined Animal Agriculture	Farmland of State Importance	206.1		0.0228791	0.000457259	50.0353	17.1215	-11.6298	0	15.9033	1.77253	0.0801433	1.69238
260	Kings	Confined Animal Agriculture	Grazing Land	38.3979		0.0219838	0.00046237	47.5459	10.914	-12.6255	0	14.6199	1.81223	-0.583645	2.39588
261	Kings	Confined Animal Agriculture	Prime Farmland	121.996		0.0220274	0.000427826	51.4868	19.4717	-11.8	0	4.25396	1.8209	-0.0333333	1.85423
262	Kings	Confined Animal Agriculture	Grazing Land	45.4		0.0232628	0.000514666	45.1998	5.43568	-12.3866	0	18.0607	1.95628	-0.424383	2.38066
263	Kings	Confined Animal Agriculture	Prime Farmland	128.871		0.0234636	0.000449814	52.163	22.1634	-11.8	0	5.22937	2.8215	-0.0333333	2.85484
264	Los Angeles	Developed/Med Intensity	Urban and Built-Up Land	0.132	1.7					-6.75		14.84	0.92	3.33333	-2.41333
265	Los Angeles	Developed/Low Intensity	Unclassified	8.62	9.4					-8.4		6.25	2.45	2.23333	0.216667
266	Los Angeles	Developed/Med Intensity	Unclassified	15.1	9.1					-8.53		6.58	3.5	2.14667	1.35333
267	Los Angeles	Developed/Med Intensity	Urban and Built-Up Land	0.869	1.7					-4.75		11.45	4.33	4.66667	-0.336667
269	Los Angeles	Developed/Med Intensity	Urban and Built-Up Land	11.1	1					-7.36		14.38	5.24	2.92667	2.31333
270	Los Angeles	Developed/Med Intensity	Urban and Built-Up Land	2.97	0.8					-5.7		16.63	6.46	4.03333	2.42667
272	Madera	Grass/Pasture	Farmland of State Importance	2.64	4.7					-10.87		4.5	-1.24	0.586667	-1.82667
273	Madera	Alfalfa	Grazing Land	10.7	8.2					-11.09		8.39	-1.15	0.44	-1.59
274	Madera	Winter Wheat	Grazing Land	8.83	6.2					-9.69		5.58	-0.81	1.37333	-2.18333
275	Madera	Almonds	Prime Farmland	1.3	2.1					-10.39		4.33	-0.72	0.906667	-1.62667
276	Madera	Alfalfa	Rural/Residential	5.46	7.1					-9.43		4.03	-0.69	1.54667	-2.23667
277	Madera	Winter Wheat	Farmland of State Importance	9.19	8.2					-9.65		3.82	-0.66	1.4	-2.06
278	Madera	Grass/Pasture	Vacant Disturbed	2.32	4.6					-9.78		5.58	-0.59	1.31333	-1.90333
279	Madera	Almonds	Farmland of State Importance	10.6	11.5					-10.83		5.57	-0.26	0.613333	-0.873333
280	Madera	Grass/Pasture	Rural/Residential	1.39	4.1					-9.85		4.46	0.02	1.26667	-1.24667
281	Madera	Grass/Pasture	Urban and Built-Up Land	3.38	5.8					-11.83		5.54	0.05	-0.0533333	0.103333
282	Madera	Almonds	Unique Farmland	4.75	7.7					-8.81		4.37	0.08	1.96	-1.88
283	Madera	Grapes	Farmland of State Importance	4.55	4.3					-11.6		5.05	0.31	0.1	0.21
284	Madera	Almonds	Prime Farmland	4.56	5.8					-11.65		3.47	0.64	0.0666667	0.573333
285	Madera	Grass/Pasture	Rural/Residential	3.26	6.4					-7.38		4.18	0.69	2.91333	-2.22333
286	Madera	Developed/Open Space	Unique Farmland	2.7	3					-8.63		4.35	0.81	2.08	-1.27
287	Madera	Cotton	Unique Farmland	10.9	6.8					-9.23		4.6	0.86	1.68	-0.82
288	Madera	Pistachios	Farmland of State Importance	6.78	5.5					-8.09		3.76	0.99	2.44	-1.45
289	Madera	Grass/Pasture	Rural/Residential	5.09	6					-7.51		4.06	1.2	2.82667	-1.62667
290	Madera	Developed/Open Space	Unique Farmland	51	6.4					-7.78		12.05	1.43	2.64667	-1.21667
291	Madera	Grass/Pasture	Rural/Residential	5.45	6.3					-7.69		3.4	1.88	2.70667	-0.826667
292	Madera	Grapes	Farmland of State Importance	6.81	3.7					-9.66		10.8	1.91	1.39333	0.516667
293	Madera	Grass/Pasture	Grazing Land	7.16	7.2					-7.63		5	2.29	2.74667	-0.456667
294	Madera	Grapes	Prime Farmland	4.83	6					-9.2		7.64	2.63	1.7	0.93
295	#REF!	Confined Animal Agriculture		201.491		0.0158639	0.000398892	39.7699	-7.82822	-10.5	0	7.40821	-0.731187	0.833333	-1.56452
296	Monterey	Winter Wheat	Other	0.8		0.0186539	0.000375359	49.696	13.3469	-6.66163	-46.2178	8.23127	0.47766	3.39225	-2.91459
297	Monterey	Grass/Pasture	Farmland of State Importance	2.00945		0.016928	0.000421081	40.2013	-7.25391	-7.01509	-45.8778	0.755809	0.762939	3.1566	-2.39367
298	Monterey	Grass/Pasture	Other	1.14903		0.018496	0.000449536	41.1447	-5.38644	-6.67667	-45.6999	-0.267193	1.02918	3.38222	-2.35304
300	Monterey	Alfalfa	Prime Farmland	0		0.0177152	0.000379274	46.7082	7.18619	-4.90809	-39.3793	4.51268	2.086	4.56127	-2.47527
301	Monterey	Alfalfa	Prime Farmland	108.077		0.0174916	0.000397255	44.0312	1.61481	-5.26903	-46.5033	2.47613	2.09177	4.32065	-2.22888
302	Monterey	Winter Wheat	Other	0		0.0181857	0.000390446	46.5767	7.11249	-6.73613	-44.9875	8.04136	2.09209	3.34258	-1.25049
303	Monterey	Grass/Pasture	Other	3.31685		0.0174092	0.00042859	40.6199	-6.38591	-6.94267	-44.4831	0.281001	2.5925	3.20489	-0.612391
305	Monterey	Alfalfa	Prime Farmland	99.29		0.0168513	0.000380173	44.3255	2.1674	-6.84417	-51.2171	3.25962	3.06968	3.27056	-0.200879
306	Monterey	Alfalfa	Prime Farmland	69.06		0.0160025	0.000368261	43.4542	0.31574	-8.37823	-52.5301	1.96465	3.18065	2.24785	0.932799
307	Monterey	Woody Wetlands	Other	2.01		0.0133598	0.000337628	39.5696	-7.0019	-5.32411	-38.8572	8.13434	4.34945	4.28393	0.0655197
308	Monterey	Woody Wetlands	Other	3.20386		0.0156539	0.000400371	39.0984	-9.35185	-6.95027	-47.2486	7.78264	5.24626	3.19982	2.04644
309	Monterey	Winter Wheat	Other	0		0.0181918	0.000399263	45.5635	5.02422	-6.11163	-44.2128	5.4441	6.78509	3.75891	3.02618
310	Orange	Developed/Low Intensity	Urban and Built-Up Land	35.3		0.0225199	0.000441471	51.0111	18.9253	-7.65	-52.9066	8.70747	0.225035	2.73333	-2.5083
311	Orange	Developed/Med Intensity	Urban and Built-Up Land	22.2		0.0197335	0.00044478	44.3669	2.63822	-7.67	-56	12.8074	0.470316	2.72	-2.24968
312	Orange	Developed/Med Intensity	Urban and Built-Up Land	49.4		0.021052	0.000408375	51.5507	18.7315	-7.84	-54.5388	12.9177	0.622442	2.60667	-1.98422
313	Orange	Developed/Low Intensity	Other	10.73		0.0078032	0.000195727	39.8677	-3.73472	-7.21	-52.7646	18.5415	1.32136	3.02667	-1.70531
314	Orange	Developed/Med Intensity	Urban and Built-Up Land	29.83		0.0270718	0.000569589	47.5286	13.3899	-9.35	-68.7228	8.54693	2.12565	1.6	0.525652
315	Orange	Developed/High Intensity	Urban and Built-Up Land	24.3		0.021103	0.000418873	50.3804	16.4878	-8.46	0	7.66768	2.30317	2.19333	0.109839
316	Orange	Developed/High Intensity	Urban and Built-Up Land	15.9		0.0247335	0.000474661	52.1078	23.2421	-9.11	-67.9827	13.1933	2.33517	1.76	0.575171
317	Orange	Developed/Med Intensity	Urban and Built-Up Land	7.8		0.0082107	0.000197089	41.6599	-1.797	-6.5	-43	10.3145	2.85726	3.5	-0.64274
318	Orange	Developed/Med Intensity	Urban and Built-Up Land	10.6		0.0200265	0.000410514	48.7839	12.5153	-9.66	-74.065	13.7906	3.21262	1.39333	1.81929
319	Orange	Developed/High Intensity	Urban and Built-Up Land	21.251		0.0213375	0.000451039	47.3074	10.0485	-8.49	-61.9746	10.3129	3.36618	2.17333	1.19285
320	Orange	Developed/Med Intensity	Urban and Built-Up Land	11.6		0.0240971	0.000459305	52.4643	23.4005	-9.62	-72.5066	15.0848	3.4881	1.42	2.0681
321	Orange	Developed/Open Space	Urban and Built-Up Land	18.9		0.0253659	0.000473627	53.5568	27.0066	-8.185	-56.9365	12.0833	3.66432	2.37667	1.28766
322	Orange	Developed/High Intensity	Urban and Built-Up Land	13.2		0.0177122	0.00038333	46.2061	6.19313	-7.5	-53.431	15.0233	3.77618	2.83333	0.942848
323	Orange	Developed/Med Intensity	Urban and Built-Up Land	6.75		0.0210193	0.000432435	48.6069	12.758	-7.93	-53.8276	10.8958	3.9382	2.54667	1.39153
324	Orange	Developed/Med Intensity	Urban and Built-Up Land	24.2		0.0244393	0.000474377	51.5188	21.6747	-8.15	-56.0118	12.6797	3.94832	2.4	1.54832
325	Orange	Developed/Med Intensity	Urban and Built-Up Land	19.6		0.0179231	0.000354946	50.4952	14.1981	-7.91	-57.1193	10.396	4.07586	2.56	1.51586
326	Orange	Developed/High Intensity	Urban and Built-Up Land	10.7		0.0185806	0.000399916	46.4613	7.02845	-8.13	-54	13.4675	4.8861	2.41333	2.47276
327	Orange	Developed/High Intensity	Urban and Built-Up Land	13.29		0.0172242	0.000389202	44.2551	2.06659	-7.48	-52.3712	16.6237	4.95923	2.84667	2.11256
328	Orange	Developed/Low Intensity	Other	0.47		0.0365142	0.000969873	37.6485	-30.472	-7.63	-52.8672	8.83843	5.10708	2.74667	2.36041
330	Orange	Developed/Med Intensity	Urban and Built-Up Land	35.51		0.0187747	0.000424642	44.213	2.15525	-7.79	-54.1757	10.814	5.64876	2.64	3.00876
331	Orange	Developed/Med Intensity	Urban and Built-Up Land	12.38		0.0189811	0.000386715	49.083	12.4327	-7.82	-54.8474	17.2333	5.79828	2.62	3.17828
332	Orange	Developed/Open Space	Urban and Built-Up Land	27.8		0.0216416	0.000422296	51.2476	18.6584	-7.4382	0	9.50808	5.98818	2.87453	3.11365
333	Orange	Developed/High Intensity	Urban and Built-Up Land	7.9		0.018243	0.000418717	43.5687	0.625415	-7.4	-51.9694	19.7921	6.16124	2.9	3.26124
334	Riverside	Developed/Med Intensity	Urban and Built-Up Land	11.5	8.1					-7.84		7.36	1.27	2.60667	-1.33667
335	Riverside	Developed/Low Intensity	Other	2.21	4.5					-8.78		4.02	1.31	1.98	-0.67
336	Riverside	Developed/Med Intensity	Urban and Built-Up Land	14.6	2.5					-8.27		5.8	1.38	2.32	-0.94
337	Riverside	Developed/Med Intensity	Urban and Built-Up Land	7.04	4.7					-7.78		5.93	2.28	2.64667	-0.366667
338	Riverside	Winter Wheat	Farmland of Local Importance	5.38	10.5					-8.11		9.01	2.49	2.42667	0.0633333
339	Riverside	Developed/Open Space	Urban and Built-Up Land	13.7	9.6					-7.45		5.64	2.49	2.86667	-0.376667
340	Riverside	Winter Wheat	Farmland of Local Importance	11	6.4					-7.38		4.94	2.54	2.91333	-0.373333
341	Riverside	Developed/Med Intensity	Urban and Built-Up Land	16.9	3.6					-6.79		4.53	2.71	3.30667	-0.596667
342	Riverside	Developed/Low Intensity	Other	7.38	8.8					-7.86		4.11	3.16	2.59333	0.566667
343	Riverside	Developed/Med Intensity	Urban and Built-Up Land	5.37	6.2					-7.21		8.26	3.51	3.02667	0.483333
344	Riverside	Developed/Open Space	Urban and Built-Up Land	6.56	9.3					-6.35		5.3	3.51	3.6	-0.09
345	Riverside	Developed/Low Intensity	Urban and Built-Up Land	19	5.8					-8.24		7.36	3.62	2.34	1.28
346	Riverside	Developed/Open Space	Urban and Built-Up Land	12.9	6.1					-7.99		7.59	3.64	2.50667	1.13333
347	Riverside	Developed/Low Intensity	Urban and Built-Up Land	17.5	7.9					-7.11		6.95	3.67	3.09333	0.576667
348	Riverside	Developed/Med Intensity	Urban and Built-Up Land	16.2	6.6					-8.4		7.85	3.92	2.23333	1.68667
349	Riverside	Developed/Med Intensity	Urban and Built-Up Land	42.7	2.6					-7.19		10.12	4	3.04	0.96
350	Riverside	Developed/Med Intensity	Urban and Built-Up Land	3.4	0.8					-7.76		5.67	4.21	2.66	1.55
351	Riverside	Developed/Med Intensity	Urban and Built-Up Land	30.2	4.9					-7.32		8.07	4.33	2.95333	1.37667
352	Riverside	Developed/Open Space	Urban and Built-Up Land	9.19	0.2					-8.3		11.74	4.4	2.3	2.1
353	Riverside	Developed/Med Intensity	Urban and Built-Up Land	24.7	4.4					-6.92		7.65	4.41	3.22	1.19
354	Riverside	Developed/Open Space	Urban and Built-Up Land	34.8	4.7					-7.28		12.4	4.46	2.98	1.48
355	Riverside	Developed/Open Space	Other	0.04	2					-7.06		-5.58	4.55	3.12667	1.42333
356	Riverside	Developed/Med Intensity	Urban and Built-Up Land	17.9	3.6					-8.35		9.14	4.6	2.26667	2.33333
357	Riverside	Developed/Med Intensity	Urban and Built-Up Land	3.89	2.1					-7.9		8.41	5.01	2.56667	2.44333
358	Riverside	Developed/Low Intensity	Urban and Built-Up Land	29.3	2.8					-7.28		8.34	5.13	2.98	2.15
359	Riverside	Developed/Open Space	Urban and Built-Up Land	78.4	0.9					-6.89		9.03	5.14	3.24	1.9
360	Riverside	Developed/Med Intensity	Urban and Built-Up Land	4.49	1.2					-7.15		8.12	5.36	3.06667	2.29333
361	Riverside	Developed/Low Intensity	Urban and Built-Up Land	28.4	4.7					-7.03		5.86	5.51	3.14667	2.36333
362	Riverside	Developed/Low Intensity	Other	4.34	8.8					-6.49		5.06	6.8	3.50667	3.29333
363	San Bernardino	Developed/Open Space	Unclassified	4.03	6.1					-12.54		7.11	-3.27	-0.526667	-2.74333
364	San Bernardino	Developed/Open Space	Unclassified	0.153	6.8					-11.54		7.99	-3.03	0.14	-3.17
365	San Bernardino	Developed/Low Intensity	Unclassified	0.475	7					-11.9		5.08	-2.87	-0.1	-2.77
366	San Bernardino	Developed/Open Space	Unclassified	0.222	1.8					-11.84		11.4	-2.87	-0.06	-2.81
367	San Bernardino	Developed/Open Space	Unclassified	6.81	6.2					-11.49		7.6	-2.4	0.173333	-2.57333
368	San Bernardino	Developed/Open Space	Unclassified	0.487	6.8					-12.44		6.65	-2.38	-0.46	-1.92
369	San Bernardino	Shrubland	Unclassified	5.27	5.4					-10.98		6.59	-2.37	0.513333	-2.88333
370	San Bernardino	Shrubland	Unclassified	5.27						-10.98		6.59	-2.37	0.513333	-2.88333
371	San Bernardino	Barren	Unclassified	0.87	10.9					-9.68		6.29	-2.11	1.38	-3.49
372	San Bernardino	Shrubland	Unclassified	4.85	5.4					-11.03		6.54	-1.78	0.48	-2.26
373	San Bernardino	Shrubland	Unclassified	4.85						-11.03		6.54	-1.78	0.48	-2.26
374	San Bernardino	Developed/Med Intensity	Grazing Land	4	6.1					-11.42		7.76	-1.71	0.22	-1.93
375	San Bernardino	Shrubland	Unclassified	0.522	4.4					-13.55		6.21	-1.58	-1.2	-0.38
376	San Bernardino	Shrubland	Unclassified	5.02	5.4					-11.06		6.83	-1.28	0.46	-1.74
377	San Bernardino	Shrubland	Unclassified	5.02						-11.06		6.83	-1.28	0.46	-1.74
378	San Bernardino	Developed/Open Space	Urban and Built-Up Land	0.468	4.5					-8.64		5.25	-1.14	2.07333	-3.21333
379	San Bernardino	Shrubland	Unclassified	4.68	5.4					-11.03		6.67	-1.1	0.48	-1.58
380	San Bernardino	Shrubland	Unclassified	4.68						-11.03		6.67	-1.1	0.48	-1.58
381	San Bernardino	Developed/Open Space	Other	0.399	5.6					-8.74		2.76	-0.85	2.00667	-2.85667
382	San Bernardino	Developed/Low Intensity	Urban and Built-Up Land	0.266	5					-9.88		4.53	-0.7	1.24667	-1.94667
383	San Bernardino	Background	Urban and Built-Up Land	1.56	8.6					-8.86		8.2	-0.46	1.92667	-2.38667
384	San Bernardino	Developed/Open Space	Unclassified	3.64	6.3					-11.11		6.42	-0.36	0.426667	-0.786667
385	San Bernardino	Shrubland	Urban and Built-Up Land	1.07	2.5					-11.48		8.78	-0.21	0.18	-0.39
386	San Bernardino	Shrubland	Grazing Land	0.49	4.1					-9.54		3.74	-0.15	1.47333	-1.62333
387	San Bernardino	Developed/Low Intensity	Unclassified	0.986	4.1					-10.03		0.02	0.06	1.14667	-1.08667
388	San Bernardino	Developed/Open Space	Unclassified	1.09	6.2					-12.05		8.72	0.07	-0.2	0.27
389	San Bernardino	Developed/Open Space	Unclassified	0.92	4.1					-11.95		8.54	0.08	-0.133333	0.213333
390	San Bernardino	Developed/Low Intensity	Urban and Built-Up Land	6.94	6.6					-8.69		7.32	0.15	2.04	-1.89
391	San Bernardino	Developed/Low Intensity	Unclassified	1.33	5.1					-10.27		7.57	0.19	0.986667	-0.796667
392	San Bernardino	Developed/Med Intensity	Urban and Built-Up Land	21.8	6.7					-7.26		7.97	0.31	2.99333	-2.68333
393	San Bernardino	Developed/Low Intensity	Urban and Built-Up Land	3.91	3.3					-8.79		5.92	0.33	1.97333	-1.64333
394	San Bernardino	Developed/Low Intensity	Urban and Built-Up Land	2.27	0					-8.44		5.71	0.33	2.20667	-1.87667
395	San Bernardino	Shrubland	Unclassified	2.56	5.8					-11.07		5.31	0.34	0.453333	-0.113333
396	San Bernardino	Shrubland	Unclassified	2.56						-11.07		5.31	0.34	0.453333	-0.113333
397	San Bernardino	Grass/Pasture	Urban and Built-Up Land	5.64	0.8					-8.6		6.54	0.4	2.1	-1.7
398	San Bernardino	Developed/Low Intensity	Urban and Built-Up Land	4.87	7.2					-8.19		4.77	0.51	2.37333	-1.86333
399	San Bernardino	Shrubland	Unclassified	0.776	11.1					-8.82		8.5	0.57	1.95333	-1.38333
400	San Bernardino	Shrubland	Unclassified	0.776						-8.82		8.5	0.57	1.95333	-1.38333
401	San Bernardino	Developed/Open Space	Grazing Land	13.9	5.7					-6.64		8.13	0.57	3.40667	-2.83667
402	San Bernardino	Developed/Open Space	Urban and Built-Up Land	5.36	6.3					-8.49		5.99	0.59	2.17333	-1.58333
403	San Bernardino	Developed/Low Intensity	Urban and Built-Up Land	5.95	0					-8.65		6.94	0.68	2.06667	-1.38667
404	San Bernardino	Developed/Low Intensity	Urban and Built-Up Land	1.06	0.4					-8.23		2.32	0.7	2.34667	-1.64667
405	San Bernardino	Developed/Open Space	Unclassified	0.971	5.5					-11.22		6.36	0.72	0.353333	0.366667
406	San Bernardino	Shrubland	Unclassified	2.65	5.8					-11.02		5.14	0.72	0.486667	0.233333
407	San Bernardino	Shrubland	Unclassified	2.65						-11.02		5.14	0.72	0.486667	0.233333
408	San Bernardino	Developed/Open Space	Grazing Land	2.97	5.7					-8.95		3.95	0.77	1.86667	-1.09667
409	San Bernardino	Developed/Low Intensity	Unclassified	0.498	0.2					-11.52		13.49	0.8	0.153333	0.646667
410	San Bernardino	Developed/Low Intensity	Urban and Built-Up Land	0.901	0.4					-8.65		2.65	0.86	2.06667	-1.20667
411	San Bernardino	Developed/Med Intensity	Urban and Built-Up Land	1.52	2					-7.59		1.38	0.9	2.77333	-1.87333
412	San Bernardino	Developed/Med Intensity	Urban and Built-Up Land	1.4	2					-7.72		1.58	0.91	2.68667	-1.77667
413	San Bernardino	Shrubland	Unclassified	0.828	0.8					-10.96		9.98	0.93	0.526667	0.403333
414	San Bernardino	Developed/Med Intensity	Grazing Land	2.31	1.6					-10.31		3.7	0.98	0.96	0.02
415	San Bernardino	Developed/Open Space	Urban and Built-Up Land	12.5	0.8					-8.37		6.59	0.99	2.25333	-1.26333
416	San Bernardino	Developed/Open Space	Urban and Built-Up Land	11.9	0.8					-8.42		6.59	1.15	2.22	-1.07
417	San Bernardino	Developed/Low Intensity	Other	3.64	6.4					-9.14		4.22	1.22	1.74	-0.52
418	San Bernardino	Developed/Open Space	Grazing Land	2.05	8.4					-9.26		5.13	1.25	1.66	-0.41
419	San Bernardino	Developed/Low Intensity	Urban and Built-Up Land	11.1	14.4					-8.73		6.4	1.25	2.01333	-0.763333
420	San Bernardino	Developed/Low Intensity	Urban and Built-Up Land	4.09	10					-8.5		7.65	1.26	2.16667	-0.906667
421	San Bernardino	Developed/Low Intensity	Urban and Built-Up Land	2.63	5.3					-9.68		7.66	1.34	1.38	-0.04
422	San Bernardino	Grass/Pasture	Urban and Built-Up Land	2.58	7.4					-8.72		5.48	1.35	2.02	-0.67
423	San Bernardino	Developed/Med Intensity	Urban and Built-Up Land	5.44	7.9					-8.46		5.19	1.35	2.19333	-0.843333
424	San Bernardino	Developed/Low Intensity	Urban and Built-Up Land	12.3	14.4					-8.68		6.22	1.36	2.04667	-0.686667
425	San Bernardino	Shrubland	Other	3.93	5.3					-8.5		4.35	1.36	2.16667	-0.806667
426	San Bernardino	Developed/Open Space	Urban and Built-Up Land	8	0.8					-8.6		6.11	1.38	2.1	-0.72
427	San Bernardino	Developed/Open Space	Urban and Built-Up Land	13.7	0.8					-8.45		6.97	1.46	2.2	-0.74
428	San Bernardino	Developed/Low Intensity	Grazing Land	4.07	7.3					-9.64		5.4	1.47	1.40667	0.0633333
429	San Bernardino	Developed/Open Space	Unclassified	1.51	4.4					-10.83		8	1.48	0.613333	0.866667
430	San Bernardino	Shrubland	Other	0.571	9.6					-9.31		3.11	1.5	1.62667	-0.126667
431	San Bernardino	Developed/Open Space	Urban and Built-Up Land	12	0.8					-8.45		6.34	1.51	2.2	-0.69
432	San Bernardino	Developed/Low Intensity	Urban and Built-Up Land	18	14.4					-8.45		6.66	1.66	2.2	-0.54
433	San Bernardino	Shrubland	Other	0.906	5.1					-8.61		7.62	1.68	2.09333	-0.413333
434	San Bernardino	Developed/Low Intensity	Urban and Built-Up Land	20.5	14.4					-8.43		6.66	1.76	2.21333	-0.453333
435	San Bernardino	Developed/Med Intensity	Unclassified	0.221	3.3					-10.16		3.35	1.77	1.06	0.71
436	San Bernardino	Developed/Low Intensity	Urban and Built-Up Land	12.1	14.4					-8.65		6.51	1.81	2.06667	-0.256667
437	San Bernardino	Developed/Open Space	Urban and Built-Up Land	9.91	0.8					-8.48		6.42	1.82	2.18	-0.36
438	San Bernardino	Developed/Low Intensity	Urban and Built-Up Land	8.05	13.7					-8.43		7.52	1.82	2.21333	-0.393333
439	San Bernardino	Evergreen Forest	Unclassified	0.364	7.8					-12.37		1.43	1.83	-0.413333	2.24333
440	San Bernardino	Developed/Low Intensity	Urban and Built-Up Land	20.8	14.4					-8.47		6.86	1.83	2.18667	-0.356667
441	San Bernardino	Barren		1.85	5					-5.72		1.56	1.84	4.02	-2.18
442	San Bernardino	Developed/Low Intensity	Urban and Built-Up Land	6.39	7.7					-7.93		4.64	1.87	2.54667	-0.676667
443	San Bernardino	Developed/Low Intensity	Urban and Built-Up Land	7.07	7.9					-7.94		6.2	1.9	2.54	-0.64
444	San Bernardino	Developed/Low Intensity	Other	1.53	4.7					-9.45		4.59	1.93	1.53333	0.396667
445	San Bernardino	Developed/Low Intensity	Urban and Built-Up Land	8.38	8.8					-9		6.56	1.96	1.83333	0.126667
446	San Bernardino	Developed/Med Intensity	Urban and Built-Up Land	2.36	9.6					-8.14		4.23	2	2.40667	-0.406667
447	San Bernardino	Evergreen Forest	Unclassified	0.714	4.8					-8.07		4.47	2.22	2.45333	-0.233333
448	San Bernardino	Grass/Pasture	Urban and Built-Up Land	0.558	0.8					-10.14		7.7	2.24	1.07333	1.16667
449	San Bernardino	Developed/Med Intensity	Urban and Built-Up Land	4.35	4.8					-8.74		6.18	2.27	2.00667	0.263333
450	San Bernardino	Shrubland	Unclassified	0.096	3.7					-10.65		6.91	2.29	0.733333	1.55667
451	San Bernardino	Developed/Med Intensity	Urban and Built-Up Land	2.95	7.7					-7.96		4.6	2.3	2.52667	-0.226667
452	San Bernardino	Shrubland	Unclassified	1.42	1.7					-11.2		10.23	2.31	0.366667	1.94333
453	San Bernardino	Barren	Other	0.179	0.8					-11.51		6.58	2.39	0.16	2.23
454	San Bernardino	Developed/Med Intensity	Urban and Built-Up Land	3.08	9.4					-8.44		4.9	2.4	2.20667	0.193333
455	San Bernardino	Developed/Med Intensity	Urban and Built-Up Land	14.8	10.1					-8.26		6.18	2.53	2.32667	0.203333
456	San Bernardino	Background	Unclassified	2.67	8.4					-10.97		8.19	2.54	0.52	2.02
457	San Bernardino	Evergreen Forest	Unclassified	0.246	5.2					-10.6		3.76	2.62	0.766667	1.85333
458	San Bernardino	Developed/Low Intensity	Unclassified	0.648	2.2					-10.31		5.52	2.74	0.96	1.78
459	San Bernardino	Shrubland	Unclassified	2.42	12.1					-10.11		3.15	2.79	1.09333	1.69667
460	San Bernardino	Shrubland	Unclassified	42.8	11.1					-9.58		6.42	2.8	1.44667	1.35333
461	San Bernardino	Shrubland	Unclassified	42.8						-9.58		6.42	2.8	1.44667	1.35333
462	San Bernardino	Developed/Med Intensity	Urban and Built-Up Land	4.54	4.8					-8.77		6.35	2.96	1.98667	0.973333
463	San Bernardino	Developed/Open Space	Urban and Built-Up Land	1.42	0.3					-8.64		4.28	3	2.07333	0.926667
464	San Bernardino	Developed/Low Intensity	Urban and Built-Up Land	4.05	7.8					-7.49		3.16	3	2.84	0.16
465	San Bernardino	Developed/Open Space	Grazing Land	5.34	7.9					-9.05		5.18	3.06	1.8	1.26
466	San Bernardino	Barren	Urban and Built-Up Land	1.5	2.9					-11.09		7.3	3.08	0.44	2.64
467	San Bernardino	Developed/Open Space	Other	3.76	10.8					-8.59		4.05	3.13	2.10667	1.02333
468	San Bernardino	Mixed Forest	Unclassified	0.109	3.6					-8.9		2.33	3.16	1.9	1.26
469	San Bernardino	Developed/Low Intensity	Urban and Built-Up Land	29.9	5					-8.25		9.46	3.22	2.33333	0.886667
470	San Bernardino	Developed/Med Intensity	Unclassified	0.036	2.5					-9.04		10.71	3.27	1.80667	1.46333
471	San Bernardino	Developed/Low Intensity	Urban and Built-Up Land	5.86	11.3					-9.02		5.16	3.27	1.82	1.45
472	San Bernardino	Shrubland	Other	2.01	7.4					-9.46		6.66	3.29	1.52667	1.76333
473	San Bernardino	Developed/Med Intensity	Urban and Built-Up Land	4.68	9.9					-7.57		3.28	3.29	2.78667	0.503333
474	San Bernardino	Grass/Pasture	Grazing Land	3.91	6.2					-8.39		5.3	3.33	2.24	1.09
475	San Bernardino	Grass/Pasture	Urban and Built-Up Land	1.17	0.3					-9.39		7.06	3.34	1.57333	1.76667
476	San Bernardino	Developed/Open Space	Urban and Built-Up Land	8.02	9					-8.46		4.98	3.35	2.19333	1.15667
477	San Bernardino	Winter Wheat	Urban and Built-Up Land	10.5	8.8					-8.08		5.44	3.35	2.44667	0.903333
478	San Bernardino	Shrubland	Unclassified	2.43	13.1					-10.38		3.42	3.36	0.913333	2.44667
479	San Bernardino	Developed/Med Intensity	Urban and Built-Up Land	7.24	7.5					-8.59		5.1	3.38	2.10667	1.27333
480	San Bernardino	Developed/Open Space	Other	3.26	9.5					-8.19		5.85	3.38	2.37333	1.00667
481	San Bernardino	Developed/High Intensity	Urban and Built-Up Land	5.88	10.1					-8.12		6.67	3.41	2.42	0.99
482	San Bernardino	Background	Other	4.19	3.3					-10.78		9.44	3.43	0.646667	2.78333
483	San Bernardino	Developed/Low Intensity	Urban and Built-Up Land	8.94	0.4					-9.4		16.4	3.44	1.56667	1.87333
484	San Bernardino	Developed/Med Intensity	Urban and Built-Up Land	7.51	8.1					-7.82		6.12	3.45	2.62	0.83
485	San Bernardino	Developed/Open Space	Urban and Built-Up Land	1.57	4					-9.43		5.76	3.46	1.54667	1.91333
486	San Bernardino	Developed/Med Intensity	Urban and Built-Up Land	8.59	12					-8.16		4.74	3.48	2.39333	1.08667
487	San Bernardino	Developed/Low Intensity	Other	5.12	8.8					-8.45		2.03	3.49	2.2	1.29
488	San Bernardino	Developed/Med Intensity	Urban and Built-Up Land	14.9	7.3					-8.56		7.24	3.5	2.12667	1.37333
489	San Bernardino	Developed/Low Intensity	Urban and Built-Up Land	5.97	11.3					-9.11		5.3	3.53	1.76	1.77
490	San Bernardino	Developed/Med Intensity	Unclassified	1.74	2.2					-6.72		4.78	3.63	3.35333	0.276667
491	San Bernardino	Developed/Med Intensity	Urban and Built-Up Land	11.4	7					-8.26		5.63	3.65	2.32667	1.32333
492	San Bernardino	Developed/Open Space	Urban and Built-Up Land	2.33	10.3					-8.77		2.61	3.66	1.98667	1.67333
493	San Bernardino	Developed/Open Space	Urban and Built-Up Land	6.96	9					-8.56		4.93	3.68	2.12667	1.55333
494	San Bernardino	Developed/Open Space	Unclassified	1.24	4					-9.72		7.23	3.69	1.35333	2.33667
495	San Bernardino	Developed/Low Intensity	Urban and Built-Up Land	10.2	7.2					-8.29		5.7	3.7	2.30667	1.39333
496	San Bernardino	Grass/Pasture	Urban and Built-Up Land	4.05	3.3					-8.62		7.28	3.73	2.08667	1.64333
497	San Bernardino	Developed/Open Space	Urban and Built-Up Land	2.74	10.3					-8.73		2.75	3.76	2.01333	1.74667
498	San Bernardino	Developed/Med Intensity	Unclassified	0.072	2.6					-9.46		2.72	3.77	1.52667	2.24333
499	San Bernardino	Developed/Open Space	Urban and Built-Up Land	7.99	9					-8.46		5.14	3.77	2.19333	1.57667
500	San Bernardino	Developed/Med Intensity	Urban and Built-Up Land	5.63	10.8					-8.54		4.5	3.8	2.14	1.66
501	San Bernardino	Developed/Open Space	Urban and Built-Up Land	8.12	9					-8.42		5.18	3.81	2.22	1.59
502	San Bernardino	Developed/Med Intensity	Urban and Built-Up Land	14	7.3					-8.43		7.29	3.82	2.21333	1.60667
503	San Bernardino	Developed/Open Space	Urban and Built-Up Land	4.86	5.5					-8.96		6.57	3.85	1.86	1.99
504	San Bernardino	Developed/Med Intensity	Urban and Built-Up Land	5.5	9.6					-7.7		3.75	3.85	2.7	1.15
505	San Bernardino	Developed/Open Space	Urban and Built-Up Land	3.69	10.3					-8.59		2.68	4.06	2.10667	1.95333
506	San Bernardino	Developed/Open Space	Urban and Built-Up Land	3.83	10.3					-8.58		2.6	4.06	2.11333	1.94667
507	San Bernardino	Developed/Med Intensity	Urban and Built-Up Land	5.41	12					-8.14		3.76	4.12	2.40667	1.71333
508	San Bernardino	Developed/Med Intensity	Urban and Built-Up Land	12.5	7.3					-8.6		7.04	4.19	2.1	2.09
509	San Bernardino	Developed/Med Intensity	Urban and Built-Up Land	14.8	7.3					-8.58		7.46	4.2	2.11333	2.08667
510	San Bernardino	Developed/Med Intensity	Urban and Built-Up Land	14.2	7.3					-8.51		7.27	4.24	2.16	2.08
511	San Bernardino	Evergreen Forest	Unclassified	0.399	1.2					-9.86		1.2	4.26	1.26	3
512	San Bernardino	Developed/Open Space	Urban and Built-Up Land	4.44	10.3					-8.48		2.67	4.26	2.18	2.08
513	San Bernardino	Grass/Pasture	Urban and Built-Up Land	7	3.3					-8.64		7.97	4.31	2.07333	2.23667
514	San Bernardino	Grass/Pasture	Urban and Built-Up Land	20.1	7.4					-8.63		8.68	4.31	2.08	2.23
515	San Bernardino	Developed/Open Space	Urban and Built-Up Land	1.34	2.2					-6.92		12.58	4.32	3.22	1.1
516	San Bernardino	Developed/Open Space	Urban and Built-Up Land	4.51	10.3					-8.47		2.76	4.41	2.18667	2.22333
517	San Bernardino	Developed/Open Space	Unclassified	0.333	5.6					-9.97		7.01	4.42	1.18667	3.23333
518	San Bernardino	Developed/Med Intensity	Urban and Built-Up Land	1.11	8					-9.78		1.99	4.48	1.31333	3.16667
519	San Bernardino	Grass/Pasture	Urban and Built-Up Land	21	0.6					-8.59		8.59	4.5	2.10667	2.39333
520	San Bernardino	Developed/Low Intensity	Urban and Built-Up Land	5.11	13.7					-8.33		11.01	4.62	2.28	2.34
521	San Bernardino	Developed/Open Space	Urban and Built-Up Land	6.28	10.3					-8.36		2.44	4.65	2.26	2.39
522	San Bernardino	Developed/Open Space	Urban and Built-Up Land	7.38	9					-8.48		6.68	4.72	2.18	2.54
523	San Bernardino	Developed/Low Intensity	Urban and Built-Up Land	1.79	0.4					-8.28		2.65	4.95	2.31333	2.63667
524	San Bernardino	Grass/Pasture	Urban and Built-Up Land	20.5	0.6					-8.69		8.62	4.98	2.04	2.94
525	San Bernardino	Developed/Low Intensity	Urban and Built-Up Land	4.45	7.8					-8.48		2.34	5.05	2.18	2.87
526	San Bernardino	Developed/Med Intensity	Urban and Built-Up Land	1.89	2					-8.51		1.72	5.08	2.16	2.92
527	San Bernardino	Developed/Med Intensity	Urban and Built-Up Land	3.53	6.1					-8.99		1.66	5.1	1.84	3.26
528	San Bernardino	Developed/Med Intensity	Urban and Built-Up Land	2.22	2					-8.52		1.8	5.39	2.15333	3.23667
529	San Bernardino	Developed/Low Intensity	Urban and Built-Up Land	7.78	11.5					-8.51		2.75	5.4	2.16	3.24
557	San Joaquin	Triticale	Urban and Built-Up Land	0.6		0.0170328	0.000446135	38.1785	-12.7023	-9.6846	-68.0246	7.09072	-2.24094	1.37693	-3.61787
558	San Joaquin	Open Water	Natural Vegetation Non-agriculutre	12.3169		0.015783	0.000378688	41.6781	-3.41455	-11.016	-79.05	6.30446	-1.77924	0.48936	-2.2686
560	San Joaquin	Triticale	Urban and Built-Up Land	0.808		0.0191972	0.000408154	47.0341	8.47283	-10.1507	-72.3263	3.4573	-1.60323	1.06623	-2.66946
564	San Joaquin	Herbaceous Wetlands	Urban and Built-Up Land	6		0.0259176	0.000547291	47.3562	12.3412	-7.95128	-54.5458	3.60963	-0.427392	2.53248	-2.95987
567	San Joaquin	Olives	Prime Farmland	1.17		0.0203997	0.000438039	46.5704	7.96419	-9.11059	-67.2856	7.94173	0.195545	1.7596	-1.56406
569	San Joaquin	Developed/Low Intensity	Urban and Built-Up Land	6.2		0.0189689	0.000447319	42.4059	-2.22353	-9.17568	-70.0374	6.01235	0.351335	1.71621	-1.36488
573	San Joaquin	Triticale	Urban and Built-Up Land	1.01		0.0159106	0.000380754	41.7872	-3.2022	-9.68546	-69.2387	8.26045	0.438626	1.37636	-0.937732
574	San Joaquin	Winter Wheat	Urban and Built-Up Land	8.47		0.0192498	0.000445642	43.1957	-0.258522	-9.63025	-71.9413	4.17802	0.594154	1.41317	-0.819016
578	San Joaquin	Winter Wheat	Urban and Built-Up Land	10.2		0.0253542	0.000549429	46.1465	8.69442	-8.92189	-64.665	9.58491	0.927121	1.88541	-0.958284
579	San Joaquin	Triticale	Urban and Built-Up Land	3.52		0.0194959	0.000470066	41.4748	-4.7697	-9.93227	-72.0664	7.78566	0.990788	1.21182	-0.221034
580	San Joaquin	Fallow/Idle Cropland	Prime Farmland	12.9		0.0306302	0.000602264	50.8584	25.307	-8.29526	-58.6714	5.11531	1.31723	2.30316	-0.985933
581	San Joaquin	Developed/Low Intensity	Urban and Built-Up Land	6.71		0.0224501	0.000499138	44.9777	4.65534	-9.22422	-65.481	3.7782	1.38157	1.68385	-0.302285
582	San Joaquin	Winter Wheat	Urban and Built-Up Land	13.72		0.0171037	0.000383056	44.6508	2.87649	-9.76085	-71.4167	4.07803	1.69743	1.3261	0.371333
583	San Joaquin	Grass/Pasture	Urban and Built-Up Land	54.8842		0.0169038	0.000397543	42.5206	-1.72252	-10.4293	-68.7505	6.53845	1.77637	0.880459	0.89591
584	San Joaquin	Walnuts	Farmland of State Importance	0.59		0.0160216	0.000395897	40.4693	-6.2302	-10.9355	-76.8959	5.44225	1.89358	0.543007	1.35057
585	San Joaquin	Developed/Med Intensity	Urban and Built-Up Land	3.01		0.0221517	0.000495588	44.6977	3.85094	-8.08832	-56.6007	8.27424	1.97946	2.44112	-0.461659
587	San Joaquin	Other Hay/Non Alfalfa	Urban and Built-Up Land	5.08		0.0203137	0.000478531	42.4502	-2.26063	-8.34625	-59.728	3.54503	2.14213	2.26917	-0.127031
589	San Joaquin	Other Hay/Non Alfalfa	Farmland of Local Importance	12.7		0.0199771	0.000468446	42.6454	-1.70469	-7.9512	-61.8194	7.26986	2.37798	2.53254	-0.154561
591	San Joaquin	Other Hay/Non Alfalfa	Urban and Built-Up Land	1.66		0.0203658	0.000487972	41.7356	-4.24393	-8.45378	-58.5251	4.88278	2.52692	2.19748	0.32944
592	San Joaquin	Grass/Pasture	Urban and Built-Up Land	55.6954		0.0168531	0.000345192	48.8226	10.598	-10.6709	-79.222	5.70669	2.617	0.719432	1.89756
596	San Joaquin	Walnuts	Urban and Built-Up Land	0.869		0.0190391	0.000449509	42.3554	-2.36054	-9.91923	-73.263	9.1154	2.7879	1.22052	1.56739
597	San Joaquin	Grass/Pasture	Urban and Built-Up Land	55.9145		0.0163672	0.000397387	41.1871	-4.66788	-10.4421	-75.4601	7.00711	2.91214	0.871941	2.0402
598	San Joaquin	Open Water	Natural Vegetation Non-agriculutre	64.304		0.0181781	0.000428019	42.4703	-1.97419	-10.3691	-72.4317	7.35697	2.94496	0.920623	2.02434
599	San Joaquin	Winter Wheat	Urban and Built-Up Land	13.1		0.0187746	0.000428537	43.811	1.21739	-9.85164	-73.5125	3.09563	3.12359	1.26558	1.85802
600	San Joaquin	Winter Wheat	Farmland of State Importance	17.4		0.0176987	0.000457539	38.6824	-11.7455	-9.20502	-67.9653	4.52158	3.61886	1.69665	1.92221
601	San Joaquin	Grass/Pasture	Urban and Built-Up Land	53.5791		0.0163492	0.000388687	42.0626	-2.67388	-10.3746	-74.6826	6.70288	3.64052	0.916943	2.72358
602	San Joaquin	Triticale	Urban and Built-Up Land	4.8		0.0237865	0.000533316	44.6012	3.85801	-9.69562	-71.4379	7.82719	3.65325	1.36958	2.28367
603	San Joaquin	Developed/High Intensity	Urban and Built-Up Land	498.009		0.0150314	0.000346212	43.4168	0.22484	-9.28681	-66.3337	7.87888	3.67483	1.64212	2.0327
605	San Joaquin	Grass/Pasture	Urban and Built-Up Land	50.4407		0.0160252	0.000367809	43.5694	0.55082	-10.0363	-75.4672	5.84822	3.88138	1.14248	2.7389
606	San Joaquin	Winter Wheat	Urban and Built-Up Land	8.36		0.0205981	0.000459352	44.8417	3.93707	-9.81132	-72.4967	0.438883	3.971	1.29245	2.67855
612	San Luis Obispo	Fallow/Idle Cropland	Other	2.2	9.1					-5.84		1.15	2.11	3.94	-1.83
613	San Luis Obispo	Developed/Med Intensity	Urban and Built-Up Land	1.67	4.3					-6.59		3.27	2.36	3.44	-1.08
614	San Luis Obispo	Developed/Open Space	Grazing Land	2.23	5.2					-6.52		3.29	2.71	3.48667	-0.776667
615	San Luis Obispo	Developed/Open Space	Prime Farmland of Local Importance	2.81	4.8					-6.5		3.77	3.13	3.5	-0.37
616	San Luis Obispo	Developed/Low Intensity	Urban and Built-Up Land	7.85	6.5					-5.95		7.44	3.26	3.86667	-0.606667
617	San Luis Obispo	Developed/Open Space	Prime Farmland	6.75	8.5					-6.5		3.68	4	3.5	0.5
618	San Luis Obispo	Developed/Med Intensity	Prime Farmland	12	8					-6.46		3.88	4.57	3.52667	1.04333
619	San Luis Obispo	Strawberries	Prime Farmland	67.8	5.9					-5.94		5.04	5.51	3.87333	1.63667
620	San Luis Obispo	Strawberries	Prime Farmland	73.3	7.6					-5.63		4.93	5.67	4.08	1.59
621	San Luis Obispo	Shrubland	Prime Farmland	77.3	7.5					-5.82		5.06	5.87	3.95333	1.91667
622	San Mateo	Developed/Low Intensity	Urban and Built-Up Land	5.28	4.7					-8.45		8.9	1.78	2.2	-0.42
623	San Mateo	Developed/High Intensity	Urban and Built-Up Land	5.66	2.6					-5.25		8.16	2.31	4.33333	-2.02333
624	San Mateo	Developed/Med Intensity	Urban and Built-Up Land	2.01	1.7					-5.94		6.9	2.77	3.87333	-1.10333
625	San Mateo	Developed/Low Intensity	Urban and Built-Up Land	6.57	1.9					-7.3		7.91	3.84	2.96667	0.873333
626	San Mateo	Developed/Med Intensity	Urban and Built-Up Land	1.29	4.8					-5.66		6.73	4.27	4.06	0.21
627	Santa Barbara	Developed/Open Space	Prime Farmland	3.18	7.2					-7.1		3.76	4.57	3.1	1.47
628	Santa Clara	Developed/Med Intensity	Urban and Built-Up Land	0.695	3.1					-7.4		7.99	0.27	2.9	-2.63
629	Santa Clara	Developed/Low Intensity	Urban and Built-Up Land	2.96	12					-6.3		6.22	1.94	3.63333	-1.69333
630	Santa Clara	Developed/Low Intensity	Prime Farmland	30.2		0.0248149	0.000491342	50.5044	19.6791	-5.80445	-39	6.69554	2.35385	3.9637	-1.60985
631	Santa Clara	Developed/Med Intensity	Urban and Built-Up Land	2.15	7.9					-6.2		7.5	2.37	3.7	-1.33
632	Santa Clara	Developed/Med Intensity	Urban and Built-Up Land	3.06	5.9					-6.67		7.17	2.5	3.38667	-0.886667
633	Santa Clara	Developed/Low Intensity	Urban and Built-Up Land	4.85	4.9					-6.96		6.8	2.6	3.19333	-0.593333
634	Santa Clara	Developed/Med Intensity	Urban and Built-Up Land	7.66	4.8					-6.15		7.68	2.75	3.73333	-0.983333
635	Santa Clara	Developed/High Intensity	Urban and Built-Up Land	1.93	3.8					-6.76		7.76	3.11	3.32667	-0.216667
636	Santa Clara	Developed/Med Intensity	Urban and Built-Up Land	3.78	3					-6.7		6.06	3.21	3.36667	-0.156667
637	Santa Clara	Developed/Med Intensity	Urban and Built-Up Land	5.35	7.9					-6.8		6.45	3.27	3.3	-0.03
638	Santa Clara	Developed/Low Intensity	Urban and Built-Up Land	5.89	8.8					-6.73		6.95	3.31	3.34667	-0.0366667
639	Santa Clara	Developed/Open Space	Grazing Land	0		0.0188667	0.000454313	41.5279	-4.4757	-6.33	0	4.04	3.35	3.61333	-0.263333
640	Santa Clara	Developed/Med Intensity	Urban and Built-Up Land	4.07	6.3					-6.84		5.87	3.48	3.27333	0.206667
641	Santa Clara	Developed/Low Intensity	Urban and Built-Up Land	0.612	0.8					-5.82		9.42	3.54	3.95333	-0.413333
642	Santa Clara	Developed/Low Intensity	Urban and Built-Up Land	3.8	1.1					-6.29		7.94	3.56	3.64	-0.08
643	Santa Clara	Developed/Low Intensity	Other	3.43	3.3					-6.17		6.14	3.58	3.72	-0.14
644	Santa Clara	Developed/Low Intensity	Urban and Built-Up Land	6.56	0.3					-6.56		6.7	3.64	3.46	0.18
645	Santa Clara	Developed/Open Space	Urban and Built-Up Land	6.2	5.8					-6.36		6.85	3.72	3.59333	0.126667
646	Santa Clara	Developed/Med Intensity	Urban and Built-Up Land	0.982	1.1					-6.19		8.44	4.2	3.70667	0.493333
647	Santa Clara	Developed/Open Space	Urban and Built-Up Land	5.6	5.7					-6.67		9.92	4.24	3.38667	0.853333
648	Santa Clara	Developed/Open Space	Other	35.63		0.0214605	0.00045228	47.4496	10.4336	-5.76	-44	6.97	4.27	3.99333	0.276667
649	Santa Clara	Alfalfa	Other	0.887	1.1					-6.02		6.96	4.43	3.82	0.61
650	Santa Clara	Developed/Med Intensity	Urban and Built-Up Land	4.44	4.1					-6.5		6.83	4.46	3.5	0.96
651	Santa Clara	Developed/Open Space	Grazing Land	0		0.0257876	0.000586199	43.9912	2.25248	-6.26	0	10.039	4.66198	3.66	1.00198
652	Santa Clara	Developed/Low Intensity	Urban and Built-Up Land	6.13	7.3					-7.35		6.68	4.67	2.93333	1.73667
653	Santa Clara	Developed/Med Intensity	Urban and Built-Up Land	1.36	< 0.2					-6.64		8.01	4.69	3.40667	1.28333
654	Santa Clara	Developed/Med Intensity	Other	0		0.0186617	0.00045177	41.3079	-5.00329	-6.47	0	5.81	4.84	3.52	1.32
655	Santa Clara	Developed/Med Intensity	Urban and Built-Up Land	1.2	2.1					-5.75		7.09	4.97	4	0.97
656	Santa Clara	Developed/Med Intensity	Urban and Built-Up Land	0		0.0211559	0.000453829	46.6164	8.36713	-6.01	-40	5.91	5.11	3.82667	1.28333
657	Santa Clara	Developed/Low Intensity	Prime Farmland	0		0.0175873	0.000396067	44.4047	2.43251	-5.81	0	5.87	5.15	3.96	1.19
658	Santa Clara	Developed/Low Intensity	Urban and Built-Up Land	3.3	2.4					-6.14		8.73	5.33	3.74	1.59
659	Santa Clara	Developed/Med Intensity	Urban and Built-Up Land	31.23		0.0225424	0.000473521	47.6059	11.3352	-6.08	-42.5	6.89	5.39	3.78	1.61
660	Santa Clara	Developed/Low Intensity	Urban and Built-Up Land	5.43		0.0187296	0.000446605	41.9377	-3.38239	-5.95835	-39	8.37239	5.43393	3.8611	1.57282
661	Santa Clara	Developed/Low Intensity	Other	32.77		0.013196	0.000333383	39.582	-6.89083	-6.73	-50	7.445	5.49	3.34667	2.14333
663	Santa Clara	Developed/Low Intensity	Urban and Built-Up Land	5.33	5.1					-6.79		10.31	5.76	3.30667	2.45333
664	Santa Clara	Developed/Low Intensity	Urban and Built-Up Land	3.72	0.2					-6.11		8.35	5.86	3.76	2.1
665	Santa Clara	Developed/Open Space	Urban and Built-Up Land	0		0.0212495	0.000506936	41.9176	-3.89603	-6.1	0	6.12	5.9	3.76667	2.13333
666	Santa Clara	Grass/Pasture	Other	0						-5.24	-35.5	5.1	5.94	4.34	1.6
667	Santa Clara	Developed/Low Intensity	Urban and Built-Up Land	3.51	0.6					-6.29		8.05	5.96	3.64	2.32
668	Santa Clara	Alfalfa	Prime Farmland	45		0.0248578	0.000543316	45.752	7.4063	-5.57804	-41	9.31593	5.969	4.11464	1.85436
669	Santa Clara	Grass/Pasture	Other	0		0.0156532	0.000379354	41.2627	-4.29659	-7.42	0	3.85	6	2.88667	3.11333
670	Santa Clara	Almonds	Grazing Land	0		0.0150418	0.000358434	41.9653	-2.65958	-5.79	0	3.99	6.09	3.97333	2.11667
671	Santa Clara	Grass/Pasture	Grazing Land	0		0.0142043	0.000332625	42.7036	-1.10286	-6.02	0	6.26	6.1	3.82	2.28
672	Santa Clara	Developed/Low Intensity	Prime Farmland	33.3		0.0253578	0.00052768	48.0553	13.9499	-5.59	0	5.87	6.16	4.10667	2.05333
673	Santa Clara	Alfalfa	Prime Farmland	49.3		0.0233879	0.000534141	43.786	1.4433	-5.61	0	7.8	6.38	4.09333	2.28667
674	Santa Clara	Developed/High Intensity	Urban and Built-Up Land	3.81	1.1					-6.18		9.23	6.39	3.71333	2.67667
675	Santa Clara	Developed/Low Intensity	Urban and Built-Up Land	3.85	0.3					-6.22		9.17	6.81	3.68667	3.12333
676	Santa Clara	Developed/Open Space	Urban and Built-Up Land	44.61		0.0218434	0.000472895	46.1907	7.59965	-5.61	-40	8.85	6.84	4.09333	2.74667
677	Shasta	Background	Urban and Built-Up Land	0.285	4.7					-11.81		7.08	-2.47	-0.04	-2.43
678	Shasta	Background	Grazing Land	0.712	1.5					-11		3.07	-1.35	0.5	-1.85
679	Shasta	Background	Urban and Built-Up Land	0.737	4.2					-9.32		3.03	-0.92	1.62	-2.54
680	Shasta	Background	Other	0.992	6					-9.32		3.44	-0.45	1.62	-2.07
681	Shasta	Background	Prime Farmland	0.653	3.8					-9.44		3	-0.42	1.54	-1.96
682	Shasta	Background	Other	0.725	4.9					-9.93		3.08	0.26	1.21333	-0.953333
683	Shasta	Background	Grazing Land	1.05	7					-9.51		4.31	0.36	1.49333	-1.13333
684	Shasta	Background	Urban and Built-Up Land	0.841	5.6					-10.3		4.52	0.64	0.966667	-0.326667
685	Shasta	Background	Prime Farmland	1.81	6.7					-10.65		5.92	0.76	0.733333	0.0266667
686	Shasta	Background	Grazing Land	1.43	3.7					-10.42		6.44	0.77	0.886667	-0.116667
687	Shasta	Background	Urban and Built-Up Land	1.35	0.2					-10.26		4.04	0.84	0.993333	-0.153333
688	Shasta	Background	Urban and Built-Up Land	1.1	3.6					-10.49		3.79	0.9	0.84	0.06
689	Shasta	Background	Urban and Built-Up Land	1.72	6.5					-9.08		6.27	0.97	1.78	-0.81
690	Shasta	Background	Grazing Land	1.33	3.7					-10.16		6.35	1.17	1.06	0.11
691	Shasta	Background	Urban and Built-Up Land	2.34	7.5					-9.54		3.61	1.27	1.47333	-0.203333
692	Shasta	Background	Urban and Built-Up Land	1.44	< 2.0					-10.99		11.18	2	0.506667	1.49333
693	Shasta	Background	Other	2.88	3.7					-8.71		4.19	2.31	2.02667	0.283333
694	Shasta	Background	Urban and Built-Up Land	4.07	4.5					-9.26		7.98	3.31	1.66	1.65
695	Sonoma	Developed/Low Intensity	Other	31.0242		0.0180633	0.000414669	43.5608	0.601224	-6.87429	-40.7758	12.1871	4.88071	3.25047	1.63024
696	Sonoma	Developed/Low Intensity	Urban and Built-Up Land	13.941		0.0172616	0.000407777	42.331	-2.19664	-6.29403	-41.6468	11.0336	6.58174	3.63732	2.94442
697	Stanislaus	Developed/Med Intensity	Urban and Built-Up Land	11.8	3.6					-10.9		6.41	-1.1	0.566667	-1.66667
698	Stanislaus	Developed/Med Intensity	Urban and Built-Up Land	8.72	4.5					-9.9		5.08	-0.68	1.23333	-1.91333
699	Stanislaus	Barley	Grazing Land	13	6.6					-8.1		7.43	-0.41	2.43333	-2.84333
700	Stanislaus	Developed/Low Intensity	Urban and Built-Up Land	1.91	2.8					-9.28		4.56	-0.27	1.64667	-1.91667
701	Stanislaus	Developed/Low Intensity	Urban and Built-Up Land	2.3	2.8					-9.32		5.23	-0.24	1.62	-1.86
702	Stanislaus	Developed/Low Intensity	Urban and Built-Up Land	7.23	2.8					-9.15		5.84	-0.21	1.73333	-1.94333
703	Stanislaus	Developed/Med Intensity	Urban and Built-Up Land	12.6	5.1					-9.11		6.8	-0.17	1.76	-1.93
704	Stanislaus	Developed/Low Intensity	Urban and Built-Up Land	3.1	2.8					-8.61		4.94	-0.07	2.09333	-2.16333
705	Stanislaus	Developed/Med Intensity	Urban and Built-Up Land	2.39	2.7					-9.39		5.7	0.05	1.57333	-1.52333
706	Stanislaus	Developed/Low Intensity	Urban and Built-Up Land	9.73	2.8					-9.62		6.19	0.06	1.42	-1.36
707	Stanislaus	Developed/Low Intensity	Urban and Built-Up Land	3.02	2.8					-8.87		5.01	0.07	1.92	-1.85
708	Stanislaus	Developed/Med Intensity	Urban and Built-Up Land	3.02	5					-8.64		4.3	0.17	2.07333	-1.90333
709	Stanislaus	Developed/Med Intensity	Urban and Built-Up Land	1.02	2.2					-9.1		3.43	0.18	1.76667	-1.58667
710	Stanislaus	Developed/Med Intensity	Urban and Built-Up Land	3.96	4.8					-9.17		4.82	0.28	1.72	-1.44
711	Stanislaus	Developed/Med Intensity	Urban and Built-Up Land	1.45	3					-8.87		3.24	0.33	1.92	-1.59
712	Stanislaus	Developed/Low Intensity	Prime Farmland	12.9	9.3					-8.26		2.2	0.38	2.32667	-1.94667
713	Stanislaus	Developed/Low Intensity	Urban and Built-Up Land	4.5	2.8					-8.77		5.42	0.55	1.98667	-1.43667
714	Stanislaus	Developed/Low Intensity	Prime Farmland	13.4	4.8					-8.75		2.69	0.72	2	-1.28
715	Stanislaus	Developed/Low Intensity	Prime Farmland	11.5	3.6					-8.09		3.37	0.95	2.44	-1.49
716	Stanislaus	Almonds	Prime Farmland	1.78	2.7					-8.98		4.28	0.98	1.84667	-0.866667
717	Stanislaus	Almonds	Prime Farmland	3.98	5.4					-8.28		5.44	1.29	2.31333	-1.02333
718	Stanislaus	Developed/Med Intensity	Urban and Built-Up Land	3.15	5.6					-8.7		4.82	1.37	2.03333	-0.663333
719	Stanislaus	Developed/Med Intensity	Urban and Built-Up Land	4.84	1					-8.75		7.04	1.47	2	-0.53
720	Stanislaus	Developed/Med Intensity	Grazing Land	15.2	5.8					-6.92		3.54	1.86	3.22	-1.36
721	Stanislaus	Developed/Med Intensity	Grazing Land	14	7.9					-6.67		3.04	2.24	3.38667	-1.14667
722	Stanislaus	Developed/Med Intensity	Urban and Built-Up Land	4.56	1.7					-7.88		6.86	2.58	2.58	0
723	Stanislaus	Developed/Med Intensity	Urban and Built-Up Land	1.49	2					-9.04		8.62	2.84	1.80667	1.03333
724	Sutter	Fallow/Idle Cropland	Grazing Land	0.503	2.3					-7.91		4.55	-0.55	2.56	-3.11
725	Sutter	Developed/High Intensity	Urban and Built-Up Land	6.25	1.6					-8.88		6.41	4	1.91333	2.08667
727	Tehama	Background	Urban and Built-Up Land	0.716	0.6					-10.05		3.69	-1.72	1.13333	-2.85333
729	Tehama	Background	Urban and Built-Up Land	0.681	4.8					-9.28		2.84	-1.44	1.64667	-3.08667
730	Tehama	Background	Grazing Land	0.948	5.8					-9.14		3.23	-1.42	1.74	-3.16
731	Tehama	Background	Farmland of Local Importance	0.89	6.3					-9.26		3.22	-1.4	1.66	-3.06
732	Tehama	Background	Other	0.99	6.6					-9.38		2.59	-1.28	1.58	-2.86
733	Tehama	Background	Grazing Land	0.798	6					-9.36		2.5	-1.08	1.59333	-2.67333
734	Tehama	Background	Grazing Land	1.27	5.2					-9.42		3.24	-1.05	1.55333	-2.60333
735	Tehama	Background	Urban and Built-Up Land	0.681	4.8					-9.32		3.26	-0.88	1.62	-2.5
736	Tehama	Background	Grazing Land	0.95	5.4					-9.2		3.23	-0.84	1.7	-2.54
737	Tehama	Background	Prime Farmland	1.01	6.4					-9.8		3.11	-0.72	1.3	-2.02
738	Tehama	Background	Grazing Land	0.89	7.8					-9.17		1.65	-0.36	1.72	-2.08
739	Tehama	Background	Grazing Land	0.881	4					-9.19		4.38	-0.22	1.70667	-1.92667
740	Tehama	Background	Urban and Built-Up Land	0.993	3.5					-9.32		4.15	-0.16	1.62	-1.78
741	Tehama	Background	Urban and Built-Up Land	1.06	4.9					-10.2		3.52	0.16	1.03333	-0.873333
742	Tehama	Background	Urban and Built-Up Land	0.415	0.7					-9.62		4.44	0.33	1.42	-1.09
743	Tehama	Background	Urban and Built-Up Land	1.51	6					-9.07		3.19	0.33	1.78667	-1.45667
744	Tehama	Background	Other	1.5	6.1					-9.15		2.61	0.38	1.73333	-1.35333
745	Tehama	Background	Unique Farmland	1.32	5.7					-9.13		4.18	0.47	1.74667	-1.27667
746	Tehama	Background	Grazing Land	0.8	3.8					-9.22		3.5	0.54	1.68667	-1.14667
747	Tehama	Background	Prime Farmland	0.826	4.7					-9.68		2.47	0.58	1.38	-0.8
751	Tehama	Background	Urban and Built-Up Land	1.38	3.8					-10.24		4.81	1.03	1.00667	0.0233333
753	Tehama	Background	Prime Farmland	0.543	0.6					-9.51		3.27	1.11	1.49333	-0.383333
754	Tehama	Background	Urban and Built-Up Land	1.64	4.1					-9.88		5.72	1.15	1.24667	-0.0966667
756	Tehama	Background	Grazing Land	0.922	7					-9.43		3.14	1.21	1.54667	-0.336667
758	Tehama	Background	Urban and Built-Up Land	1.27	5.2					-10.25		4.76	1.29	1	0.29
759	Tehama	Background	Prime Farmland	3.02	10.8					-9.08		2.55	1.29	1.78	-0.49
760	Tehama	Background	Urban and Built-Up Land	0.93	3.3					-9.21		5.74	1.33	1.69333	-0.363333
762	Tehama	Background	Urban and Built-Up Land	0.978	2.2					-9.25		4.53	1.52	1.66667	-0.146667
763	Tehama	Background	Farmland of Local Importance	3.47	7.6					-9.2		4.39	1.7	1.7	0
764	Tehama	Background	Urban and Built-Up Land	0.815	3.4					-9.29		6.86	1.79	1.64	0.15
765	Tehama	Background	Urban and Built-Up Land	2.27	5.8					-8.95		5.1	1.8	1.86667	-0.0666667
766	Tehama	Background	Urban and Built-Up Land	1.76	3					-10.13		5.66	1.84	1.08	0.76
767	Tehama	Background	Urban and Built-Up Land	3.38	7.7					-9.64		4.23	2.28	1.40667	0.873333
768	Tehama	Background	Prime Farmland	0.829	1.3					-9.91		4.3	2.3	1.22667	1.07333
769	Tehama	Background	Grazing Land	3.18	4.6					-8.98		5.5	2.34	1.84667	0.493333
771	Tehama	Background	Grazing Land	0.277	0.7					-9.6		7.1	2.41	1.43333	0.976667
772	Tehama	Background	Prime Farmland	0.958	1.2					-11.52		8.21	2.51	0.153333	2.35667
775	Tehama	Background	Urban and Built-Up Land	2.48	2.5					-8.38		5.92	2.68	2.24667	0.433333
777	Tehama	Background	Urban and Built-Up Land	5.51	4.7					-10.26		7.44	2.77	0.993333	1.77667
779	Tehama	Background	Urban and Built-Up Land	5.86	2.5					-9.62		6.63	3.08	1.42	1.66
780	Tehama	Background	Other	5.49	3.2					-8.66		9.18	3.72	2.06	1.66
781	Tehama	Background	Urban and Built-Up Land	4.99	2.4					-10.45		6.33	4.13	0.866667	3.26333
783	Tulare	Developed/Med Intensity	Urban and Built-Up Land	3.26	5.8					-12.21		4.91	-3.21	-0.306667	-2.90333
786	Tulare	Developed/Low Intensity	Urban and Built-Up Land	2.65	6.7					-12.56		4.27	-2.54	-0.54	-2
787	Tulare	Oranges	Prime Farmland	7.43	6.6					-12.07		3.7	-2.44	-0.213333	-2.22667
789	Tulare	Developed/Low Intensity	Urban and Built-Up Land	0.431	1.1					-9.82		2.7	-1.97	1.28667	-3.25667
790	Tulare	Developed/Med Intensity	Urban and Built-Up Land	6.3	2.8					-11.65		8.08	-1.94	0.0666667	-2.00667
792	Tulare	Alfalfa	Prime Farmland	6.69	4.2					-12.17		5.89	-1.79	-0.28	-1.51
794	Tulare	Alfalfa	Prime Farmland	9.24	6.9					-11.12		6	-1.4	0.42	-1.82
795	Tulare	Fallow/Idle Cropland	Rural/Residential	7.83	6.8					-10.4		3.4	-1.31	0.9	-2.21
796	Tulare	Alfalfa	Prime Farmland	8.83	6.4					-10.99		5.78	-1.3	0.506667	-1.80667
797	Tulare	Developed/Open Space	Urban and Built-Up Land	2.34	5.5					-11.16		4.14	-1.2	0.393333	-1.59333
798	Tulare	Alfalfa	Prime Farmland	3.06	3.7					-9.9		2.43	-1.15	1.23333	-2.38333
799	Tulare	Developed/Open Space	Prime Farmland	9.2	4					-11.6		4.01	-1.1	0.1	-1.2
800	Tulare	Grass/Pasture	Rural/Residential	9.53	8.5					-9.68		2.52	-1.1	1.38	-2.48
801	Tulare	Grass/Pasture	Rural/Residential	9.97	7.4					-10.36		4.43	-1.05	0.926667	-1.97667
804	Tulare	Alfalfa	Prime Farmland	14.3	3.9					-11.99		5.37	-0.92	-0.16	-0.76
805	Tulare	Developed/Low Intensity	Urban and Built-Up Land	2.72	7.9					-11.48		6.77	-0.9	0.18	-1.08
807	Tulare	Developed/Med Intensity	Urban and Built-Up Land	20.2	5.3					-11.02		8.39	-0.67	0.486667	-1.15667
808	Tulare	Grass/Pasture	Farmland of State Importance	2.97	6.3					-13.74		5.65	-0.63	-1.32667	0.696667
809	Tulare	Developed/Open Space	Urban and Built-Up Land	2.3	1.5					-11.5		5.78	-0.62	0.166667	-0.786667
810	Tulare	Developed/Open Space	Urban and Built-Up Land	5.14	3.1					-8.28		3.49	-0.55	2.31333	-2.86333
811	Tulare	Alfalfa	Farmland of State Importance	2.66	1					-10.1		4	-0.5	1.1	-1.6
812	Tulare	Developed/Med Intensity	Urban and Built-Up Land	3.37	4					-9.5		3.84	-0.44	1.5	-1.94
813	Tulare	Developed/Open Space	Prime Farmland	7.34	7					-10.57		2.48	-0.39	0.786667	-1.17667
816	Tulare	Grass/Pasture	Farmland of Local Importance	14.5	8.6					-9.68		2.13	-0.28	1.38	-1.66
819	Tulare	Corn	Prime Farmland	30.8	6.5					-11.24		10.98	-0.06	0.34	-0.4
820	Tulare	Grass/Pasture	Natural Vegetation Non-agriculutre	1.75	6.8					-9.07		6.04	-0.06	1.78667	-1.84667
821	Tulare	Alfalfa	Prime Farmland	33.1	7.5					-10.99		11.14	-0.03	0.506667	-0.536667
822	Tulare	Developed/Low Intensity	Prime Farmland	6.65	7.6					-9.95		4.22	0.02	1.2	-1.18
823	Tulare	Grass/Pasture	Farmland of State Importance	20.1	6.2					-10.61		5.06	0.04	0.76	-0.72
824	Tulare	Almonds	Prime Farmland	5.44	8.2					-10.1		6.05	0.12	1.1	-0.98
825	Tulare	Grass/Pasture	Semi-Agriculture and Rural Commercial Lands	1.97	7.5					-12.72		3.14	0.2	-0.646667	0.846667
827	Tulare	Almonds	Prime Farmland	5.65	7.1					-9.78		2.35	0.39	1.31333	-0.923333
828	Tulare	Grapes	Farmland of State Importance	4.79	0.7					-12.6		4.53	0.46	-0.566667	1.02667
829	Tulare	Developed/Med Intensity	Urban and Built-Up Land	4.09	5.7					-8.14		4.25	0.56	2.40667	-1.84667
830	Tulare	Grass/Pasture	Urban and Built-Up Land	2.44	4.8					-12.08		5.54	0.95	-0.22	1.17
831	Tulare	Olives	Farmland of State Importance	4.8	8.8					-10.19		4.7	1.06	1.04	0.02
832	Tulare	Developed/Low Intensity	Urban and Built-Up Land	2.88	2.2					-8.9		4.46	1.26	1.9	-0.64
835	Tulare	Developed/Open Space	Rural/Residential	29.1	1.7					-9.39		13.1	1.44	1.57333	-0.133333
836	Tulare	Oats	Rural/Residential	24.1	5.9					-9.63		7.18	1.69	1.41333	0.276667
837	Tulare	Winter Wheat	Rural/Residential	14.7	7.8					-6.23		4.08	1.73	3.68	-1.95
840	Tulare	Winter Wheat	Farmland of Local Importance	2.36	8					-8.77		6.4	1.97	1.98667	-0.0166667
841	Tulare	Grass/Pasture	Natural Vegetation Non-agriculutre	0.221	0.9					-9.7		4.6	2.16	1.36667	0.793333
842	Tulare	Grass/Pasture	Farmland of State Importance	11.2	7.2					-8.17		4.13	2.22	2.38667	-0.166667
843	Tulare	Olives	Prime Farmland	17.1	5.7					-9.82		6.32	2.24	1.28667	0.953333
844	Tulare	Grass/Pasture	Rural/Residential	21.9	7.6					-6.16		3.33	2.31	3.72667	-1.41667
845	Tulare	Pistachios	Rural/Residential	6.95	5					-9.85		8.26	2.36	1.26667	1.09333
846	Tulare	Grass/Pasture	Rural/Residential	19	5.1					-7.9		5.94	2.67	2.56667	0.103333
847	Tulare	Oranges	Farmland of State Importance	16.9	6.4					-9.6		6.38	2.71	1.43333	1.27667
849	Tulare	Grass/Pasture	Rural/Residential	17.2	7.1					-8.36		4.47	2.9	2.26	0.64
850	Tulare	Grass/Pasture	Grazing Land	0.7	1.6					-9.66		1.83	3.01	1.39333	1.61667
851	Tulare	Developed/Low Intensity	Rural/Residential	13.3	3.7					-6.88		5.91	3.01	3.24667	-0.236667
852	Tulare	Developed/Open Space	Natural Vegetation Non-agriculutre	4.04	4					-9.04		3.09	3.06	1.80667	1.25333
855	Tulare	Developed/Open Space	Rural/Residential	11.9	3.9					-7.47		4.3	3.3	2.85333	0.446667
857	Tulare	Grass/Pasture	Farmland of Local Importance	10.6	6.4					-7.61		1.66	3.42	2.76	0.66
858	Tulare	Grass/Pasture	Grazing Land	5.19	3					-8.36		8.35	3.53	2.26	1.27
859	Tulare	Woody Wetlands	Rural/Residential	11.6	4.8					-8.4		4.61	3.6	2.23333	1.36667
862	Tulare	Oranges	Farmland of State Importance	7.07	6					-10.2		5.83	3.83	1.03333	2.79667
863	Tulare	Grass/Pasture	Farmland of State Importance	21.2	6.7					-9.91		5.38	4.16	1.22667	2.93333
865	Tulare	Grass/Pasture	Farmland of Local Importance	5.82	< 0.2					-7.54		6.08	4.45	2.80667	1.64333
866	Tulare	Developed/Open Space	Natural Vegetation Non-agriculutre	5.99	1.9					-9.11		8.85	4.54	1.76	2.78
867	Tulare	Developed/Open Space	Farmland of Local Importance	1.34	0.9					-8.63		7.92	4.69	2.08	2.61
869	Tulare	Grass/Pasture	Grazing Land	0.88	0.5					-8.58		6.12	5.1	2.11333	2.98667
870	Tulare	Grass/Pasture	Farmland of Local Importance	0.777	1					-7.86		9.88	5.28	2.59333	2.68667
871	Tulare	Grass/Pasture	Farmland of Local Importance	6.67	1.1					-5.68		4.28	5.32	4.04667	1.27333
872	Tulare	Grass/Pasture	Farmland of Local Importance	23.1	4.8					-7.29		5.12	5.33	2.97333	2.35667
873	Ventura	Developed/Open Space	Urban and Built-Up Land	0.04	0.3					-7.43		8.15	2.99	2.88	0.11
874	Ventura	Grass/Pasture	Urban and Built-Up Land	12.4	7.7					-6.78		6.74	3.34	3.31333	0.0266667
875	Ventura	Developed/Open Space	Prime Farmland	2.1	4.6					-7.65		13.12	3.89	2.73333	1.15667
876	Ventura	Grass/Pasture	Grazing Land	0.945	5.9					-7.23		5.58	4.28	3.01333	1.26667
877	Ventura	Developed/Low Intensity	Prime Farmland	15.2	2.6					-5.92		5.68	4.86	3.88667	0.973333
878	Ventura	Shrubland	Prime Farmland	2.71	7.3					-7.34		7.16	4.95	2.94	2.01
879	Ventura	Barren	Urban and Built-Up Land	2.33	7.9					-6.96		13.44	5.49	3.19333	2.29667
880	Ventura	Shrubland	Other	11.2	5					-6.16		3.43	5.67	3.72667	1.94333
881	Ventura	Mixed Forest	Prime Farmland	22.2	3.2					-6.6		6.03	5.77	3.43333	2.33667
882	Yolo	Fallow/Idle Cropland	Prime Farmland	13	6.9					-5.81		4.53	3.37	3.96	-0.59
883	Yuba	Developed/Open Space	Other	0.864	0.8					-7.51		9.35	3.54	2.82667	0.713333
884	Yuba	Grass/Pasture	Urban and Built-Up Land	0.299	0.4					-6.65		11.76	5.28	3.4	1.88
885		Grass/Pasture		4.79	5.7					-9.02		5.71	0.73	1.82	-1.09
886		Developed/Low Intensity		4.66	3.1					-8.36		4.9	0.83	2.26	-1.43
887		Developed/Open Space	#N/A	7.06	4.6					-8.98		5.84	1.66	1.84667	-0.186667
888		Barren		2.61	5.6					-6.61		3.63	1.73	3.42667	-1.69667
889		Alfalfa		23.8	6.3					-8.62		4.89	2.04	2.08667	-0.0466667
890		Barren		1.46	2					-6		5.16	2.39	3.83333	-1.44333
891		Developed/Med Intensity		2.14	1					-7.8		8.86	2.4	2.63333	-0.233333
892		Shrubland		12.7	6.3					-6.5		6.89	2.51	3.5	-0.99
893		Barren		1.98	3.1					-5.15		5.82	2.62	4.4	-1.78
894		Developed/Low Intensity		8.45	0.6					-6.2		7.83	2.74	3.7	-0.96
895		Developed/Low Intensity		7.47	9.4					-6.7		7.28	3.3	3.36667	-0.0666667
896		Developed/Low Intensity		11.2	3					-6.54		10.14	3.61	3.47333	0.136667
897		Developed/Low Intensity		4.78	0.2					-6.04		6.3	4.08	3.80667	0.273333
898	Alameda	Developed/Low Intensity	Urban and Built-Up Land	0.047	10.5					-13.38		-2.12	-8.65	-1.08667	-7.56333
905	Alameda	Developed/Open Space	Grazing Land	11.9823		0.0212406	0.000500264	42.4587	-2.33976	-8.79	-66	8.53	6.02	1.97333	4.04667
912	Alameda	Grass/Pasture	Other	14.8		0.0170508	0.000447739	38.082	-12.9884	-7.79907	-58.1637	15.5085	6.29732	2.63395	3.66337
919	Alameda	Developed/Med Intensity	Urban and Built-Up Land	16.5911		0.0160673	0.000394223	40.757	-5.57339	-7.22	-53	12.98	6.74	3.02	3.72
921	Alameda	Developed/Low Intensity	Other	31.6		0.0127707	0.000317948	40.166	-5.53952	-8.07661	-54.9642	12.1299	6.80646	2.44893	4.35754
924	Alameda	Developed/Low Intensity	Other	34.66		0.0146226	0.000353838	41.3258	-3.88346	-7.98892	-57.9795	14.6271	7.42029	2.50739	4.9129
926	Alameda	Developed/Med Intensity	Urban and Built-Up Land	3.63	< 0.2					-6.67		11.57	7.6	3.38667	4.21333
930	Alameda	Developed/Open Space	Farmland of State Importance	19.3		0.0170541	0.000436171	39.0995	-10.1853	-8.05598	-55.3235	11.9498	8.26456	2.46268	5.80188
931	Alameda	Developed/Med Intensity	Urban and Built-Up Land	1.84	0.7					-6.33		17.47	8.3	3.61333	4.68667
933	Alameda	Developed/Low Intensity	Other	10.3		0.0161873	0.000406199	39.8507	-7.78924	-7.88978	-51.1477	18.673	8.64626	2.57348	6.07277
936	Alameda	Developed/Med Intensity	Urban and Built-Up Land	0.69	0.3					-6.68		13.26	9.21	3.38	5.83
937	Alameda	Developed/Low Intensity	Other	33.2		0.0105991	0.000286379	37.0106	-10.0131	-7.85847	-51.4214	17.9912	9.34135	2.59435	6.74699
944	Alameda	Grass/Pasture	Other	38		0.0153332	0.000363931	42.1322	-2.3627	-7.67861	-56.502	19.6855	10.5978	2.71426	7.88358
951	Alameda	Developed/Med Intensity	Urban and Built-Up Land	0.49	0.5					-6.28		18.68	11.64	3.64667	7.99333
953	Alameda	Developed/Open Space	Urban and Built-Up Land	23.2537		0.0175311	0.000404563	43.3333	0.0748841	-7.27	-52	17.39	11.77	2.98667	8.78333
955	Alameda	Developed/Med Intensity	Urban and Built-Up Land	0.152	< 0.2					-7.27		16.59	12.16	2.98667	9.17333
958	Alameda	Developed/Med Intensity	Urban and Built-Up Land	0.278	0.2					-7.28		13.74	12.58	2.98	9.6
966	Alameda	Developed/Med Intensity	Other	16.8		0.0134494	0.000327411	41.0781	-4.04419	-7.77527	-53.9426	10.2964	15.5251	2.64982	12.8752
970	Alameda	Developed/Low Intensity	Urban and Built-Up Land	22.8844		0.0179987	0.000397985	45.2245	4.25797	-5.10911	-37.5637	7.31746	16.6859	4.42726	12.2586
975	Alameda	Developed/Low Intensity	Urban and Built-Up Land	15.0927		0.0180479	0.000406008	44.4521	2.60034	-7.41838	-52.2079	7.69766	20.1552	2.88775	17.2675
977	Butte	Background	Urban and Built-Up Land	40.46		0.0178597	0.000429453	41.5871	-4.08946	-9.38433	0	6.73542	-2.84071	1.57711	-4.41782
978	Butte	Background	Urban and Built-Up Land	30.03		0.0172394	0.000418501	41.1931	-4.90185	-8.80195	0	7.85839	-2.83801	1.96537	-4.80338
979	Butte	Background	Urban and Built-Up Land	8.7379		0.0188838	0.000447538	42.195	-2.74929	-10.1394	0	6.00303	-2.73999	1.07375	-3.81374
980	Butte	Background	Urban and Built-Up Land	13.4776		0.016239	0.000385154	42.1624	-2.43579	-9.72232	0	4.12274	-2.73367	1.35179	-4.08545
981	Butte	Background	Urban and Built-Up Land	3.1391		0.0178282	0.000416337	42.8215	-1.10754	-9.97517	0	4.84063	-2.71795	1.18322	-3.90117
982	Butte	Background	Urban and Built-Up Land	21.0482		0.0172664	0.000388207	44.4774	2.54098	-8.54726	0	6.53916	-1.72909	2.13516	-3.86425
983	Butte	Background	Urban and Built-Up Land	60.7		0.0204984	0.000442711	46.3019	7.38832	-8.34353	0	4.19186	-1.52738	2.27098	-3.79836
984	Butte	Background	Urban and Built-Up Land	0.9177		0.0132954	0.00033282	39.9477	-6.20261	-9.96667	0	4.38539	4.64542	1.18889	3.45653
985	Butte	Fallow/Idle Cropland	Other	0.315	0.3					-10.11		19.89	11.89	1.09333	10.7967
986	Colusa	Developed/Open Space	Prime Farmland	7.38	2.2					-9.21		10.21	6.2	1.69333	4.50667
991	Fresno	Developed/Open Space	Urban and Built-Up Land	0.66	3.6					-9.76		8.65	-4	1.32667	-5.32667
992	Fresno	Almonds	Prime Farmland	3.53	0.5					-12.83		10.49	3.5	-0.72	4.22
993	Fresno	Grass/Pasture	Unique Farmland	16.2	3.2					-11.67		4.74	3.54	0.0533333	3.48667
994	Fresno	Developed/Open Space	Natural Vegetation Non-agriculutre	1.01	4.5					-13.39		5.38	3.85	-1.09333	4.94333
995	Fresno	Developed/Open Space	Urban and Built-Up Land	5.7	7.1					-13.41		7.97	3.91	-1.10667	5.01667
996	Fresno	Grapes	Unique Farmland	4.71	2					-10.79		9.44	4.3	0.64	3.66
997	Fresno	Grass/Pasture	Farmland of State Importance	37.3	3.7					-9.26		6.92	7.32	1.66	5.66
998	Fresno	Oranges	Farmland of Local Importance	18.4	6.3					-11.6		5.26	8.87	0.1	8.77
999	Fresno	Pistachios	Prime Farmland	8.69	< 0.2					-7.13		10.6	9.47	3.08	6.39
1000	Fresno	Barren	Farmland of State Importance	12.7	< 0.2					-8.04		14.66	14.76	2.47333	12.2867
1002	Glenn	Background	Farmland of Local Importance	0.756	2.7					-9.55		2.52	-3.09	1.46667	-4.55667
1003	Glenn	Developed/Open Space	Prime Farmland	0.262	< 0.2					-9.66		9.76	6.69	1.39333	5.29667
1004	Kern	Developed/Open Space	Rural/Residential	0.362	2.4					-12.43		12.28	7.12	-0.453333	7.57333
1006	Kern	Developed/Open Space	Farmland of State Importance	7.4	< 0.2					-8.79		7.73	8.64	1.97333	6.66667
1007	Kern	Developed/High Intensity	Vacant Disturbed	2.75	0.2					-9.35		8.98	8.93	1.6	7.33
1009	Kings	Onions	Semi-Agriculture and Rural Commercial Lands	0.087	5.2					-8.99		-10.46	-6.42	1.84	-8.26
1010	Kings	Almonds	Unique Farmland	1.48	2					-12.62		0.62	-6.03	-0.58	-5.45
1011	Kings	Confined Animal Agriculture	Grazing Land	8.95025		0.0200251	0.000399806	50.0871	15.0854	-14.2	0	18.9369	1.81954	-1.63333	3.45287
1012	Kings	Confined Animal Agriculture	Farmland of State Importance	219.556		0.0242047	0.000469883	51.5122	21.4521	-11.4287	-90	19.3998	4.13932	0.214191	3.92513
1013	Kings	Confined Animal Agriculture	Farmland of State Importance	225.857		0.0262957	0.000579643	45.3653	6.65521	-11.7	-88	16.7765	4.37791	0.0333333	4.34458
1014	Kings	Confined Animal Agriculture	Confined Animal Agriculture	65.5971		0.0213156	0.000374916	56.8542	28.2507	-11.7342	-89	17.8174	4.62137	0.0105193	4.61085
1015	Kings	Confined Animal Agriculture	Prime Farmland	91.2205		0.0232481	0.00039815	58.3902	33.4013	-12	0	11.7969	4.82105	-0.166667	4.98772
1016	Kings	Confined Animal Agriculture	Farmland of State Importance	135.106		0.02664	0.00047469	56.1209	33.8338	-12.3	0	15.8427	5.17096	-0.366667	5.53763
1020	Kings	Confined Animal Agriculture	Confined Animal Agriculture	141.892		0.0220162	0.000405912	54.2388	24.6845	-10.9655	-71.4876	18.7903	7.16963	0.522969	6.64666
1021	Kings	Confined Animal Agriculture	Prime Farmland	62.8857		0.0265511	0.000412379	64.3852	48.3389	-12	0	15.1493	7.37862	-0.166667	7.54529
1023	Kings	Confined Animal Agriculture	Confined Animal Agriculture	246.847		0.0283639	0.000488228	58.0956	40.1585	-11.7798	0	16.8652	7.7403	-0.0198401	7.76014
1025	Kings	Confined Animal Agriculture	Confined Animal Agriculture	6.70275		0.0242962	0.00036721	66.1641	46.6759	-11.905	-90	6.37874	11.2599	-0.103318	11.3632
1028	Kings	Confined Animal Agriculture	Confined Animal Agriculture	18.695		0.0326454	0.00041331	78.9854	81.9953	-11.8902	-91	10.6816	15.9626	-0.0934886	16.0561
1040	Los Angeles	Developed/Low Intensity	Other	0.157	5.8					-4.78		108	19.48	4.64667	14.8333
1041	Los Angeles	Developed/Low Intensity	Other	0.293	5.8					-4.98		102	20.26	4.51333	15.7467
1042	Madera	Winter Wheat	Unique Farmland	0.736	3.6					-9.79		4.26	-2.53	1.30667	-3.83667
1043		Confined Animal Agriculture		425.06		0.0221919	0.000349642	63.4704	39.2067	-9.3	0	13.8962	7.35405	1.63333	5.72071
1044		Confined Animal Agriculture		163.127		0.0236438	0.000351486	67.2681	46.8343	-9.1	0	19.8544	9.23833	1.76667	7.47166
1046	Monterey	Grass/Pasture	Other	0		0.0211042	0.000472063	44.7063	3.69072	-7.11019	-48.0354	-0.710345	-1.82822	3.09321	-4.92142
1047	Monterey	Winter Wheat	Other	0.8		0.0169502	0.000384011	44.1398	1.79291	-6.14999	-41.3426	8.19822	-0.585728	3.73334	-4.31907
1050	Monterey	Developed/Low Intensity	Other	3.35949		0.0157251	0.000408075	38.5348	-10.8105	-6.86401	-45.3281	8.18387	6.85941	3.25733	3.60208
1052	Monterey	Fallow/Idle Cropland	Other	8.54		0.0182358	0.000390225	46.7316	7.44452	-5.18414	-41.4337	8.29601	9.14021	4.37724	4.76297
1054	Monterey	Fallow/Idle Cropland	Other	2.97		0.0166087	0.000387554	42.8551	-0.95857	-5.0851	-38.8768	10.4374	11.7662	4.44326	7.32293
1055	Monterey	Developed/Low Intensity	Other	0		0.0157317	0.000388125	40.5327	-5.97108	-5.15263	-37.8076	11.6906	12.4348	4.39825	8.0366
1056	Monterey	Fallow/Idle Cropland	Other	3.95529		0.0200697	0.000418045	48.0084	10.9425	-5.07334	-38.3631	11.7165	15.9584	4.45111	11.5072
1057	Monterey	Developed/Low Intensity	Other	0		0.0147997	0.000373946	39.5771	-7.73955	-6.01835	-41.0085	5.23101	16.12	3.8211	12.2989
1058	Monterey	Developed/Low Intensity	Other	1.95		0.0154248	0.000364765	42.2871	-2.05405	-5.27565	-39.0873	17.105	18.2667	4.31623	13.9504
1059	Monterey	Developed/Low Intensity	Other	4.22773		0.0168112	0.000391307	42.9618	-0.735816	-5.28497	-35.5498	14.8443	18.7569	4.31002	14.4469
1060	Monterey	Developed/Low Intensity	Other	0.67799		0.0165263	0.00037046	44.6103	2.69859	-3.24923	-29.5744	-7.77574	20.2115	5.66718	14.5443
1061	Orange	Developed/Med Intensity	Urban and Built-Up Land	0.83		0.0205892	0.000445497	46.2162	7.2225	-8.8	-61.5662	-1.81087	-11.4189	1.96667	-13.3855
1062	Orange	Developed/Med Intensity	Urban and Built-Up Land	26.04		0.0226524	0.000472581	47.9334	12.1729	-8.3	-57.4537	12.1038	6.07199	2.3	3.77199
1063	Orange	Developed/High Intensity	Urban and Built-Up Land	10.4		0.00952001	0.000234121	40.6628	-3.43243	-8.11	-56.0517	17.521	6.25487	2.42667	3.8282
1064	Orange	Developed/Low Intensity	Urban and Built-Up Land	34.46		0.0208241	0.000418163	49.799	15.1082	-7.30815	0	8.50048	7.04216	2.96124	4.08093
1066	Orange	Developed/Med Intensity	Urban and Built-Up Land	35.74		0.0186732	0.000360254	51.8335	17.0906	-6.85193	0	10.2743	8.06125	3.26538	4.79587
1067	Orange	Developed/Med Intensity	Urban and Built-Up Land	21.319		0.0206538	0.000420302	49.1404	13.6466	-7.73	-55.0385	16.2762	8.24471	2.68	5.56471
1069	Orange	Developed/Med Intensity	Urban and Built-Up Land	3.85		0.0079546	0.000207334	38.3662	-5.68693	-7.84	0	13.2396	8.94542	2.60667	6.33875
1070	Orange	Developed/Med Intensity	Urban and Built-Up Land	14.57		0.0146203	0.000343273	42.5909	-1.35327	-7.6	-51.5562	14.3329	9.08957	2.76667	6.32291
1071	Orange	Developed/Med Intensity	Urban and Built-Up Land	13.38		0.019055	0.000385033	49.4894	13.2486	-7.23885	0	18.3153	9.11517	3.00743	6.10774
1082	Riverside	Grass/Pasture	Urban and Built-Up Land	1.38	5.6					-6.6		10.94	7.71	3.43333	4.27667
1083	Riverside	Grass/Pasture	Farmland of Local Importance	0.585	0.6					-8.2		13.07	8.27	2.36667	5.90333
1084	Riverside	Developed/Open Space	Farmland of Local Importance	0.184	< 0.2					-9.13		11.36	9.32	1.74667	7.57333
1087	Riverside	Developed/Open Space	Urban and Built-Up Land	11.1	0.1					-6.76		11.91	13.2	3.32667	9.87333
1088	San Bernardino	Developed/Open Space	Unclassified	0.117	6.6					-12.32		4.23	-5.6	-0.38	-5.22
1089	San Bernardino	Developed/Low Intensity	Unclassified	0.306	3.4					-12.19		6.92	-4.9	-0.293333	-4.60667
1090	San Bernardino	Developed/Open Space	Unclassified	18.6	6.5					-10.9		9.7	-3.78	0.566667	-4.34667
1091	San Bernardino	Developed/Open Space	Unclassified	12.7	6.5					-10.87		9.24	-3.73	0.586667	-4.31667
1092	San Bernardino	Developed/Open Space	Unclassified	12.6	6.5					-10.9		9.06	-3.72	0.566667	-4.28667
1093	San Bernardino	Developed/Low Intensity	Other	0.123	5.3					-6.52		6.17	-1.7	3.48667	-5.18667
1094	San Bernardino	Mixed Forest	Unclassified	0.22	2.9					-9.31		1.63	4.95	1.62667	3.32333
1095	San Bernardino	Developed/Open Space	Urban and Built-Up Land	1.29	0.3					-8.58		4.47	5.54	2.11333	3.42667
1096	San Bernardino	Developed/Open Space	Urban and Built-Up Land	6.09	9.2					-8.29		2.54	5.86	2.30667	3.55333
1097	San Bernardino	Developed/Med Intensity	Urban and Built-Up Land	1.58	8					-9.47		1.78	5.91	1.52	4.39
1098	San Bernardino	Developed/Med Intensity	Urban and Built-Up Land	2.82	2					-8.47		1.82	5.96	2.18667	3.77333
1099	San Bernardino	Developed/Med Intensity	Urban and Built-Up Land	2.56	2					-8.57		1.84	6.07	2.12	3.95
1100	San Bernardino	Developed/Low Intensity	Urban and Built-Up Land	0.528	0.6					-8.81		11.96	6.1	1.96	4.14
1101	San Bernardino	Developed/Med Intensity	Urban and Built-Up Land	2.6	2					-8.51		1.71	6.14	2.16	3.98
1102	San Bernardino	Grass/Pasture	Other	4.99	9.7					-8.39		1.36	6.24	2.24	4
1103	San Bernardino	Barren	Unclassified	2.47	10.9					-10.32		1.81	6.26	0.953333	5.30667
1104	San Bernardino	Developed/Med Intensity	Urban and Built-Up Land	0.051	0.2					-8.62		16.65	6.36	2.08667	4.27333
1105	San Bernardino	Grass/Pasture	Prime Farmland	11.6	8.3					-8.8		5.54	6.41	1.96667	4.44333
1106	San Bernardino	Shrubland	Unclassified	0.163	0.7					-9.97		5.25	6.43	1.18667	5.24333
1107	San Bernardino	Developed/Low Intensity	Urban and Built-Up Land	7.36	0.4					-8.24		3.15	6.45	2.34	4.11
1108	San Bernardino	Shrubland	Grazing Land	0.646	0.4					-11.7		9.05	6.48	0.0333333	6.44667
1109	San Bernardino	Developed/Low Intensity	Urban and Built-Up Land	7.32	0.4					-8.19		3.21	6.51	2.37333	4.13667
1110	San Bernardino	Developed/Open Space	Other	10.4	2					-8.5		11.14	6.57	2.16667	4.40333
1111	San Bernardino	Shrubland	Unclassified	0.473	6.3					-10.58		4.68	6.65	0.78	5.87
1112	San Bernardino	Developed/Open Space	Other	2.11	11					-8.18		1.18	6.68	2.38	4.3
1113	San Bernardino	Shrubland	Unclassified	0.062	1.2					-10.02		11.71	7.14	1.15333	5.98667
1114	San Bernardino	Developed/Low Intensity	Urban and Built-Up Land	0.705	1					-9.38		7.83	7.2	1.58	5.62
1115	San Bernardino	Developed/Med Intensity	Urban and Built-Up Land	6.97	7					-8.45		2.05	7.59	2.2	5.39
1116	San Bernardino	Developed/Med Intensity	Other	2.27	11					-8.68		2.39	8	2.04667	5.95333
1117	San Bernardino	Developed/Low Intensity	Grazing Land	2.73	10					-8.73		1.08	8.45	2.01333	6.43667
1118	San Bernardino	Developed/Med Intensity	Other	4.25	11					-8.67		2.84	8.81	2.05333	6.75667
1119	San Bernardino	Developed/Med Intensity	Other	4.21	11					-8.71		2.89	8.86	2.02667	6.83333
1120	San Bernardino	Developed/Med Intensity	Other	4.26	11					-8.72		2.86	8.9	2.02	6.88
1121	San Bernardino	Developed/Med Intensity	Other	4.26	11					-8.67		2.97	8.92	2.05333	6.86667
1122	San Bernardino	Developed/Med Intensity	Other	4.25	11					-8.71		2.84	8.93	2.02667	6.90333
1123	San Bernardino	Developed/Med Intensity	Other	4.28	11					-8.63		2.84	8.95	2.08	6.87
1124	San Bernardino	Developed/Low Intensity	Other	5.82	1.1					-8.03		17.46	9.03	2.48	6.55
1125	San Bernardino	Developed/Open Space	Urban and Built-Up Land	1.22	0.3					-8.6		5.19	9.44	2.1	7.34
1126	San Bernardino	Developed/Open Space	Unclassified	0.403	6.8					-9.05		4.49	9.94	1.8	8.14
1127	San Bernardino	Background	Urban and Built-Up Land	0.644	0.3					-11.76		18.39	10.04	-0.00666667	10.0467
1128	San Bernardino	Grass/Pasture	Urban and Built-Up Land	1.25	0.8					-8.16		5.7	10.33	2.39333	7.93667
1129	San Bernardino	Shrubland	Unclassified	3.83	7.8					-8.73		-0.39	10.42	2.01333	8.40667
1131	San Bernardino	Developed/Med Intensity	Unclassified	0.021	5.1					-11.57		18.67	19.66	0.12	19.54
1150	San Joaquin	Developed/High Intensity	Urban and Built-Up Land	46.6546		0.0167926	0.000385077	43.6085	0.660477	-11.7341	-84.2763	7.58636	3.53195	0.0106027	3.52135
1154	San Joaquin	Winter Wheat	Urban and Built-Up Land	0.4		0.0144183	0.000361385	39.8973	-6.83627	-10.9023	-75.4143	-2.65996	5.68778	0.565125	5.12265
1155	San Joaquin	Triticale	Urban and Built-Up Land	13.8		0.0182487	0.000442209	41.2671	-4.99759	-8.98016	-64.9121	9.39607	5.75947	1.84656	3.91291
1157	San Joaquin	Grass/Pasture	Urban and Built-Up Land	57.5861		0.0167452	0.000351281	47.6688	8.53181	-10.3631	-76.5704	4.45487	6.01736	0.924602	5.09275
1159	San Joaquin	Grass/Pasture	Urban and Built-Up Land	57.3252		0.0166732	0.000337797	49.3585	11.3774	-10.557	-77.0203	5.54047	6.62107	0.795362	5.82571
1161	San Joaquin	Grass/Pasture	Urban and Built-Up Land	50.6442		0.018401	0.000326923	56.2853	23.6004	-9.97493	-75.1418	5.79508	6.95958	1.18338	5.7762
1162	San Joaquin	Walnuts	Farmland of State Importance	2.55		0.0169881	0.000367557	46.219	5.96453	-8.52075	-61.8592	0.903284	7.20601	2.15283	5.05318
1164	San Joaquin	Walnuts	Prime Farmland	343.557		0.0189885	0.000380151	49.9499	14.0538	-10.0446	-65.4936	7.67908	7.62993	1.13697	6.49296
1167	San Joaquin	Walnuts	Farmland of State Importance	1.56		0.0171501	0.000458247	37.4254	-14.9658	-10.7103	-79	3.71237	9.0509	0.693151	8.35775
1168	San Joaquin	Winter Wheat	Farmland of State Importance	1.64		0.0169388	0.000433727	39.0541	-10.2378	-9.14255	-67.754	9.75134	9.05691	1.7383	7.31861
1169	San Joaquin	Developed/Low Intensity	Urban and Built-Up Land	680.581		0.0171652	0.000335977	51.0905	14.5512	-9.61469	-70.1685	3.44855	9.94186	1.42354	8.51831
1172	San Joaquin	Other Hay/Non Alfalfa	Urban and Built-Up Land	1766.1		0.0185637	0.000341671	54.3322	20.9552	-8.19032	-60.1024	5.73956	11.0156	2.37312	8.64249
1175	San Joaquin	Developed/High Intensity	Urban and Built-Up Land	413.269		0.0176207	0.000300191	58.6982	25.6975	-7.52864	-57.5682	8.44485	12.9144	2.81424	10.1001
1178	San Joaquin	Other Tree Crops	Urban and Built-Up Land	0.337		0.0137694	0.000335306	41.0653	-4.16572	-9.77803	-69.857	15.1396	14.6939	1.31465	13.3793
1179	San Joaquin	Other Hay/Non Alfalfa	Urban and Built-Up Land	662.737		0.01739	0.000237439	73.2397	39.5205	-8.06795	-59.6982	4.36815	15.6954	2.4547	13.2407
1181	San Joaquin	Winter Wheat	Farmland of State Importance	0.43		0.0223292	0.000510094	43.7746	1.346	-8.6346	-62.7118	10.685	16.7643	2.07694	14.6874
1182	San Joaquin	Open Water	Urban and Built-Up Land	0.2		0.0126254	0.000308556	40.9177	-4.08658	-11.707	-83.4363	4.16206	23.0888	0.0286414	23.0602
1183	San Joaquin	Winter Wheat	Urban and Built-Up Land	0.4		0.0201279	0.00039209	51.335	17.5143	-8.81723	-60.5546	-2.37715	23.1621	1.95518	21.2069
1184	San Joaquin	Winter Wheat	Urban and Built-Up Land	0.4		0.0174639	0.00039877	43.7945	1.0963	-8.93716	-62.5585	-2.38699	24.6718	1.87522	22.7966
1186	San Luis Obispo	Developed/Low Intensity	Other	5.08	1.7					-4.51		14.61	14.79	4.82667	9.96333
1188	San Mateo	Developed/Med Intensity	Urban and Built-Up Land	0.328	0.2					-5.75		16.22	11.89	4	7.89
1189	Santa Clara	Mixed Forest	Other	0.113	5					-6.7		4.78	-0.92	3.36667	-4.28667
1190	Santa Clara	Grass/Pasture	Other	0		0.0199931	0.000471113	42.438	-2.25771	-7.43	0	4.94	6.46	2.88	3.58
1191	Santa Clara	Developed/Low Intensity	Urban and Built-Up Land	0		0.0206355	0.000469154	43.9844	1.78516	-6.5	-45	6.24	7.23	3.5	3.73
1192	Santa Clara	Developed/Low Intensity	Farmland of State Importance	0		0.0220644	0.000529047	41.7059	-4.68863	-6.17	0	6.13	7.25	3.72	3.53
1193	Santa Clara	Developed/Med Intensity	Urban and Built-Up Land	0.521	< 0.2					-6.51		11.58	7.6	3.49333	4.10667
1194	Santa Clara	Grass/Pasture	Other	0		0.0174738	0.000437869	39.9064	-8.26086	-6.25	0	6.62	7.8	3.66667	4.13333
1195	Santa Clara	Developed/Med Intensity	Urban and Built-Up Land	2.91	1.8					-6.05		9.47	7.89	3.8	4.09
1196	Santa Clara	Grass/Pasture	Urban and Built-Up Land	5.22		0.0174466	0.000400843	43.5247	0.500823	-6.00978	-39	11.436	7.98343	3.82681	4.15662
1197	Santa Clara	Developed/Open Space	Urban and Built-Up Land	0		0.0216106	0.000519437	41.6039	-4.89782	-6.135	0	6.12	8.07	3.74333	4.32667
1198	Santa Clara	Developed/Med Intensity	Urban and Built-Up Land	1.14	0.4					-6.32		13.25	8.15	3.62	4.53
1199	Santa Clara	Developed/Low Intensity	Urban and Built-Up Land	2.56	0.6					-6.4		13.31	8.27	3.56667	4.70333
1200	Santa Clara	Developed/Open Space	Urban and Built-Up Land	3.99	1.1					-6.08		11.23	8.65	3.78	4.87
1201	Santa Clara	Developed/Open Space	Urban and Built-Up Land	3.93	1					-6.18		10.91	8.67	3.71333	4.95667
1202	Santa Clara	Developed/Low Intensity	Prime Farmland	40.4		0.0258709	0.0004986	51.8871	23.8025	-5.66376	-41	13.3799	9.08981	4.0575	5.03232
1203	Santa Clara	Developed/Open Space	Farmland of State Importance	0		0.0199949	0.000445165	44.9158	3.9988	-6.28	0	5.86	9.68	3.64667	6.03333
1207	Santa Clara	Developed/Open Space	Urban and Built-Up Land	0		0.0215786	0.000502683	42.9269	-1.04263	-6.05	0	6.84	10.38	3.8	6.58
1208	Santa Clara	Developed/Med Intensity	Other	0		0.019277	0.000427862	45.0542	4.17264	-7.08	-51	11.32	10.57	3.11333	7.45667
1209	Santa Clara	Grass/Pasture	Urban and Built-Up Land	5.4992		0.0222538	0.000524603	42.4202	-2.56594	-5.33	0	9.64	11.03	4.28	6.75
1210	Santa Clara	Developed/Open Space	Urban and Built-Up Land	0		0.0184918	0.000444852	41.5684	-4.2825	-6.71	0	4	11.17	3.36	7.81
1211	Santa Clara	Grass/Pasture	Grazing Land	3.85		0.0169252	0.000381934	44.3145	2.15412	-6.0761	-40	12.035	11.7747	3.7826	7.99209
1212	Santa Clara	Grass/Pasture	Grazing Land	4.566		0.0199735	0.000450451	44.341	2.60698	-5.46	0	10.25	12.75	4.19333	8.55667
1214	Santa Clara	Fallow/Idle Cropland	Farmland of State Importance	10.2		0.0249007	0.000493384	50.4693	19.6644	-5.1691	-39	17.3679	14.966	4.38727	10.5787
1215	Santa Clara	Grass/Pasture	Urban and Built-Up Land	0		0.0144356	0.000343838	41.9837	-2.51605	-8	0	13.65	15.35	2.5	12.85
1217	Santa Clara	Almonds	Prime Farmland	41.01		0.0261681	0.000444055	58.9298	38.5845	-5.86203	-42	16.0029	17.2221	3.92531	13.2968
1219	Shasta	Background	Grazing Land	0.066	0.6					-9.89		-2	-5.35	1.24	-6.59
1221	Sonoma	Developed/Low Intensity	Other	9.7243		0.0166142	0.000389855	42.6165	-1.48139	-6.48852	-40.6442	12.6175	7.16817	3.50765	3.66052
1222	Sonoma	Developed/Med Intensity	Grazing Land	4.11335		0.0152217	0.000376013	40.4818	-5.89104	-7.0063	-41.4924	11.655	11.1681	3.16247	8.00563
1224	Stanislaus	Grass/Pasture	Grazing Land	0		0.000366361	40.1441	-6.42767		-47.4527		3.48537	-0.302874	-23.8018	23.499
1225	Stanislaus	Grass/Pasture	Grazing Land	0						-45.8707		11.7311	2.20011	-22.7471	24.9472
1226	Stanislaus	Grass/Pasture	Grazing Land	0		0.000302455	40.5785	-4.57602		-47.753		5.27179	2.34699	-24.002	26.349
1227	Stanislaus	Grass/Pasture	Grazing Land	0						-47.9935		6.60537	5.52365	-24.1624	29.686
1228	Stanislaus	Almonds	Prime Farmland	17.4	4.8					-11.22		7.25	5.57	0.353333	5.21667
1229	Stanislaus	Grass/Pasture	Grazing Land	0						-48.7856		4.00843	5.9197	-24.6904	30.6101
1230	Stanislaus	Barley	Grazing Land	1.57	0.5					-8.39		13.93	7.83	2.24	5.59
1231	Stanislaus	Grass/Pasture	Grazing Land	0						-48.6968		19.528	12.4747	-24.6312	37.1059
1235	Tehama	Background	Grazing Land	0.848	8.2					-9.12		2.69	-1.97	1.75333	-3.72333
1247	Tulare	Pistachios	Farmland of State Importance	1.31	3.3					-10.85		7.85	4.81	0.6	4.21
1248	Tulare	Developed/Open Space	Grazing Land	2.11	1.7					-8.84		10.62	5.25	1.94	3.31
1249	Tulare	Grass/Pasture	Farmland of State Importance	29.3	1.2					-9.86		16.82	5.36	1.26	4.1
1250	Tulare	Grass/Pasture	Rural/Residential	1.36	1.4					-9.94		9.46	5.72	1.20667	4.51333
1251	Tulare	Confined Animal Agriculture	Confined Animal Agriculture	0.524	< 0.2					-10.62		19.67	6.99	0.753333	6.23667
1252	Tulare	Grass/Pasture	Farmland of Local Importance	41.2	3.7					-7.4		7.86	7.09	2.9	4.19
1256	Tulare	Shrubland	Grazing Land	0.211	3.5					-6.7		14.32	12.55	3.36667	9.18333
1257	Ventura	Developed/Med Intensity	Urban and Built-Up Land	2.06	1.1					-7.41		9.36	6.36	2.89333	3.46667
1258	Ventura	Developed/Med Intensity	Urban and Built-Up Land	1.85	< 0.2					-7.61		11.24	10.61	2.76	7.85
1259	Ventura	Developed/Med Intensity	Urban and Built-Up Land	12.9	0.4					-7.16		10.26	10.74	3.06	7.68
1260	Ventura	Grass/Pasture	Urban and Built-Up Land	3.01	0.3					-7.26		16.74	11.85	2.99333	8.85667
1262	Yolo	Fallow/Idle Cropland	Prime Farmland	0.729	1.3					-10.61		13.78	5.58	0.76	4.82
1264	Yuba	Developed/Med Intensity	Urban and Built-Up Land	0.922	1					-9.47		7.46	6.6	1.52	5.08
